# Supplementary material for: Computer vision profiling of neurite outgrowth dynamics reveals spatiotemporal modularity of Rho GTPase signaling
Source: PubMed Central journal article supplement — J Cell Biol. 2016 Jan 4;212(1):91–111. doi: 10.1083/jcb.201506018 (PMC4700477; doi:10.1083/jcb.201506018), 2016-01-04
Supplement: JCB_201506018_TableS1.pdf [file JCB_201506018_TableS1.pdf]

Table S1. All siRNAs in the RNAi library

| Sample lot | siRNA name         | Sense sequence             | Antisense sequence         |
|------------|--------------------|----------------------------|----------------------------|
| 154653A01  | Arhgef1/MSS205912  | GGAGAUUCUGCACCAUGUCAAUCAA  | UUGAUUGACAUGGUGCAGAAUCUCC  |
| 154653A03  | Arhgef1/MSS205911  | GCGAGUGACCAAAGACAAAGCUAUA  | UAUAGCUUUGUCUUUGGUCACUCGC  |
| 154653A05  | Arhgef1/MSS205910  | CCCUGUUCUCGUAUCGCUUGAUGAA  | UUCAUCAAGCGAUCGAGGAACAGGG  |
| 154653A07  | Kalrn/MSS285208    | CGGAACGCCGAGGUGUUCUCAAAU   | AUUUGAGGAACACCUCGGCGUUCGG  |
| 154653A09  | Kalrn/MSS285209    | GAAACAGGAGAAUUAUACCUCUCA   | UUGAGAGGUAUAUUCUCCUGUUUC   |
| 154653A11  | Kalrn/MSS285210    | GAUGGCUUCUCAGGGCGCAACUGCA  | UGCAGUUGCGCCUGAGAAGCCAUC   |
| 154653B01  | Arhgef11/MSS277794 | GGACCUGCUGGAGAGUGACAGUUCA  | UGAACUGUCACUCUCCAGCAGGUCC  |
| 154653B03  | Arhgef11/MSS277793 | CACAUCCAGCUUACUUGGUAGUAUU  | AAUACUACCAAGUAAGCUGGAUGUG  |
| 154653B05  | Arhgef11/MSS210532 | GCAAGGAGAGUCGAUUCAGCUCUU   | AAGAGCUGGAAUCGACUCUCCUUGC  |
| 154653B07  | Arhgef18/MSS272159 | CACUAAAGAUCAUGCUGAAAGUAUA  | UAUACUUUCAGCAUGAUCUUUAGUG  |
| 154653B09  | Arhgef18/MSS200224 | GCAGAUUCUCAGAUCCGCAUGAGU   | ACUCAUGGCCGAUCUGAGAAUCUGC  |
| 154653B11  | Arhgef18/MSS200223 | CCACUGUCCUGGAAUJAGAGCUGGU  | ACCAGCUCUAAUUCAGGACAGUGG   |
| 154653C01  | BC067047/MSS219653 | GCCAUGAAGACUGUCUGCUCCAACA  | UGUUGGAGCAGACAGUCUUAUGGC   |
| 154653C03  | BC067047/MSS219654 | CCAUGUCCACUACGAGUUCUCAA    | UUUUGAACUCGUAGUGGGACAUGG   |
| 154653C05  | BC067047/MSS282431 | CCUUCUCCUUUAAGCAGCUGGAUGA  | UCAUCCAGCUGCUUAAAGGAGAAGG  |
| 154653C07  | Rggef/MSS201356    | GGUAACCGACUUGGCAGUCUCUGAU  | AUCAGAGACUGCCAAGUCGGUJACC  |
| 154653C09  | Rggef/MSS201357    | GAGAUGUACGAAUCCACACCAAUU   | AAUUGGUGUGGAUUUCGUACAUCUC  |
| 154653C11  | Rggef/MSS201358    | CCAACAGAACUGAAGAUAGACAUUU  | AAAUGUCUAUCUUCAGUUCUGUUGG  |
| 154653D01  | Arhgef2/MSS205909  | GGAUUCCAGCCAGAAGGAUCGGAU   | AUUCGGAUCCUUCUGGCUGGAAUCC  |
| 154653D03  | Arhgef2/MSS205908  | ACCCGGAACUUUGUCAUCCAUCGUU  | AACGAUGGAUGACAAAGUCCGGGU   |
| 154653D05  | Arhgef2/MSS205907  | CACUGCUUUGCAGUCUGUCUCCCUU  | AAGGGAGACAGACUGCAAAGCAGUG  |
| 154653D07  | Arhgef3/MSS230875  | GGCUCAACUGUAUCCGUCAGGCAAA  | UUUGCCUGACGGAUACAGUUGAGCC  |
| 154653D09  | Arhgef3/MSS230874  | CCAGCAGCACCUGGAAGAAGCUAUA  | UAUAGCUUCUCCAGGUGCUGCUGG   |
| 154653D11  | Arhgef3/MSS230873  | GAGAAAUCCUGAGGCAUACACCAA   | UUUGGUGUAUGCCUCAGGAUUUCUC  |
| 154653E01  | Sos1/MSS209264     | GAAAGGAAUUAUUCAGCCUGUGCA   | UGCACAGGCUGAAUUAUUCUUCUUC  |
| 154653E03  | Sos1/MSS209266     | GAGUUCAUAAUGGAAGGAACUCUUA  | UAAGAGUCCUUCUUAUGAACUC     |
| 154653E05  | Sos1/MSS277177     | CCUCCCACAGUUGAGUGGCACAUAA  | UUUUGGCCACUCAACUGUGGGAGG   |
| 154653E07  | Swap70/MSS277502   | CAAUCAGGGCUACAUGCCAUUUUA   | UAAAUUAGGCAUGUAGCCCUGAUUG  |
| 154653E09  | Swap70/MSS277503   | CAGAGGACAAGUAUCCACUAAUUAU  | AUAAUUAGUGGAUACUUGUCCUCUG  |
| 154653E11  | Swap70/MSS277504   | CAGAAGAGAUUGAAUACCUGCUUAA  | UUUAGCAGGUAUUCUUCUUCUG     |
| 154653F01  | Arhgef7/MSS285069  | GAGUUCAGCAAACACUUCAUUUUA   | UAAAUUAGAAUGUUUGCUGAACUC   |
| 154653F03  | Arhgef7/MSS225490  | CCAACUGGUAGUACGAGCCAAGUUU  | AAACUUGGCUCGUACUACCAGUUGG  |
| 154653F05  | Arhgef7/MSS225488  | GAGGACCUAGGAGAGUUCUUGGAAA  | UUUCAUGAACUCUCCUAGGUCCUC   |
| 154653F07  | Def6/MSS215619     | AGGAGCUGCUCAAGUCUUCUGGUA   | UACCAGAUAGACUUGAGCAGCUCCU  |
| 154653F09  | Def6/MSS280278     | GCUUUCGUCUUAUGGUGCCUCUUCA  | UGAAGAGGCACCAUAGACGGAAAGC  |
| 154653F11  | Def6/MSS215620     | UGCAUCCGAUCGAGCCAGGAGAUAA  | UUUUCUCCUGGCUCGUAUCGGAUGCA |
| 154653G01  | Trio/MSS278694     | CAGCGUGCCCAAGCGAGCCAAUGAU  | AUCAUUGGCUCGCUUGGGCACGCUG  |
| 154653G03  | Trio/MSS278695     | CCUCAGGAGGCUCAUUUCCUUAUUUA | UAAAUAGGAAAUGAGCCUCCUGAGG  |
| 154653G05  | Trio/MSS278696     | GAGAAAGCUGUAGAAGUCAUGUGCA  | UGCACAUGACUUCUACAGCUUUCUC  |
| 154653G07  | Tsc1/MSS227144     | GGAGGAACACAAUGCAGCAAUGAAA  | UUUCAUUGCUGCAUUGUGUUCUCC   |
| 154653G09  | Tsc1/MSS227145     | UGGAACUGGAGAUCUAGACUUGUA   | UACAAGUCUAGGAUCUCCAGUCCA   |

|           |                    |                            |                           |
|-----------|--------------------|----------------------------|---------------------------|
| 154653G11 | Tsc1/MSS227146     | GACACCAUGGUGACCCAACUGCAUA  | UAUGCAGUUGGGUCACCAUGGUGUC |
| 154653H01 | Dock10/MSS210019   | CCAGGAAGAACUGAGGUCCCAUUUAU | AUAAUGGGACCUCAGUUCUCCUGG  |
| 154653H03 | Dock10/MSS210018   | GCACAGGUCUCAGACUUUACCUAUA  | UAUAGGUAAAGUCUGAGACCUUGUC |
| 154653H05 | Dock10/MSS210017   | CCAGAGGUGUCAGACUUCUUCAGCA  | UGCUGAAGAAGUCUGACACCUCUGG |
| 154653H07 | Vav2/MSS238640     | GACAAAUGGGCGGAUCGGUUGGUUU  | AAACCAACCGAUCCGCCCAUUUGUC |
| 154653H09 | Vav2/MSS238641     | CCUCAAGUCUGCCAUGACAAUUUU   | AAUUUUGUCAUGGCAGACUUUGAGG |
| 154653H11 | Vav2/MSS238642     | GGUACAACUUUGCUGCUCGAGACAU  | AUGUCUCGAGCAGCAAAGUUGUACC |
| 154654A01 | Dock4/MSS280225    | CAGAUAGACAUUAUCAGCAACUUCU  | AGAAGUUGCUGAUAAUGUCUAUCUG |
| 154654A03 | Dock4/MSS280226    | GAGCAAAGAAGGAGUGGCAACUUUA  | UAAAGUUGCCACUCCUUCUUUGCUC |
| 154654A05 | Dock4/MSS280227    | UAUCACCGAGAUGACAUCAACUUUA  | UAAAGUUGAUGUCAUCUCGGUGAUA |
| 154654A07 | Dock7/MSS228219    | CCACGGUACUCUGACCCUCAGAUAA  | UUAUCUGAGGGUCAGAGUACCGUGG |
| 154654A09 | Dock7/MSS289303    | CCGUAGUCCGGUUUCUUCUUCUUCU  | AGAAGAUGAAGAAACCGGACUACGG |
| 154654A11 | Dock7/MSS289304    | CGUCAUUUAUAAAUCGACUUCACAA  | UUGUGAAGUCGAUUUAUAAUUGACG |
| 154654B01 | Vav3/MSS226475     | GGUGGGCUGGUUUCCAUCACAUUAU  | AUAUGUGGAUGGAAACCAGCCCACC |
| 154654B03 | Vav3/MSS226477     | GGGAGCUCUCCCUAUUGAAAGGAGA  | UCUCCUUCAAUAGGGAGAGCUCCC  |
| 154654B05 | Vav3/MSS285951     | GGAAAGAUUGCAGGCAGAAACUGAA  | UUCAGUUUCUGCCUGCAAUCUUUCC |
| 154654B07 | Centd2/MSS229844   | GGCCUGUCAAGAGCCUCAAGUCUA   | UAGACUUUGAGGCUCUUGACAGGCC |
| 154654B09 | Centd2/MSS229845   | UCCACGAUCGCUACUUAUUCUCAA   | UUGAGAAUGAAGUAGCGAUCGUGGA |
| 154654B11 | Centd2/MSS290899   | AGGUGGAGACUGAACAGCAUGUUA   | UUAACAUGCUGUUCAGUCUCCACCU |
| 154654C01 | Dock9/MSS200569    | GCAUGCUCAGAACCUGCUGAUAAA   | UUUAUCAGCAGGUUCUUGAGCAUGC |
| 154654C03 | Dock9/MSS272388    | GAUCUCCAGCUUGACUACUCCUUA   | UUAAGGAGUAGUCAAGCUGGAGAUC |
| 154654C05 | Dock9/MSS272389    | UGGAUAUGAUCAAACUGCAGCUCAA  | UUGAGCUGCAGUUUGAUCAUAUCCA |
| 154654C07 | Ect2/MSS203768     | CCUUCCAUUCGAACCUCAAAGAAA   | UUUCUUUGAAGGUUCGAAUGGAAGG |
| 154654C09 | Ect2/MSS203769     | GGGAUGAAAGGUGCACUCACCUUAU  | AUAAGGUGAGUGCACCUUUCAUCCC |
| 154654C11 | Ect2/MSS274062     | CAGAUUUCUUUGAUGUGCAUAUGAA  | UUCAUAUGCACAUCAAGAUUUCUG  |
| 154654D01 | Arhgap1/MSS238961  | GCUAAAGAUGCUGCCAUCACCCUCA  | UGAGGGUGAUGGCAGCAUCUUUAGC |
| 154654D03 | Arhgap1/MSS238962  | CCAACACUAACUUGGCUGUAGUCUU  | AAGACUACAGCCAAGUUAGUGUUGG |
| 154654D05 | Arhgap1/MSS238963  | UGACACAGCAGGUUCUCCAAACUCU  | AGAGUUUGGAGAACCUCUGUGUCA  |
| 154654D07 | Arhgap10/MSS234252 | GCGAGGGCUGAUUCCACAGAAUUUAU | AUAAUUCUGUGGAAUCAGCCCUCGC |
| 154654D09 | Arhgap10/MSS234253 | ACAUUCAGAAUACACGGAAUCGAUU  | AAUCGAUUCGGUGUAUUCUGAAUGU |
| 154654D11 | Arhgap10/MSS294204 | CAAGUCACUCGAAGCAGAAUCUAU   | AUUAGAUUCUGCUUCGAGUGACUUG |
| 154654E01 | Fgd2/MSS218495     | CCUGCUACACAUUUCUCACUGGAAA  | UUUCCAGUGAGAAAUGUGUAGCAGG |
| 154654E03 | Fgd2/MSS218496     | GACCCAAUGGAACGCUACCUGGUUU  | AAACCAGGUAGCGUCCAUUGGGUC  |
| 154654E05 | Fgd2/MSS218497     | CCCUACUGGGCUAUCAGGUGAUUUC  | GAAAUACCCUGAUAGCCCAGUAGGG |
| 154654E07 | Itsn1/MSS275155    | CAGCUGGCUUCAAUUGGAAUCUUU   | AAAGAUUCCAUAUUGAAGCCAGCUG |
| 154654E09 | Itsn1/MSS275156    | CAGAAGAAUUUAUCCUAGCUAUGCA  | UGCAUAGCUAGGAUAAAUUCUUCUG |
| 154654E11 | Itsn1/MSS275157    | CAGGCAAGAACUAUUCUCAUGCAU   | AUUGCAUGAGAAUAGUUCUUGCCUG |
| 154654F01 | Arhgap17/MSS230246 | CCUGGAGAGGUAGAAUUCUAUGUAU  | AUACAUUGAAUUCUACCUCUCCAGG |
| 154654F03 | Arhgap17/MSS230247 | ACUGUGCGUUCAAUGUGCCACCAUU  | AAUGGUGGCACAUUGAACGCACAGU |
| 154654F05 | Arhgap17/MSS230248 | CAACUUGCAGCAGACAUGUACAACU  | AGUUGUACAUGUCUGCUGCAAGUUG |
| 154654F07 | Arhgap21/MSS230777 | CCAUCCCAAGGAAUGGAGAUUAAA   | UUUAUAUCUCCAUCCUUGGGAUGG  |
| 154654F09 | Arhgap21/MSS230778 | CCACCACAGUCACCUGACCAAUUA   | UUUUUUGGUCAGGUGACUGUGGUGG |

|           |                    |                           |                            |
|-----------|--------------------|---------------------------|----------------------------|
| 154654F11 | Arhgap21/MSS230779 | ACGAUGCACGCAGAGAGGUCCAUAU | AUAUGGACCUCUCUGCGUGCAUCGU  |
| 154654G01 | Arhgap26/MSS230710 | ACAAAUJCAUCAAGGAGCUCAUCAA | UUGAUGAGCUCCUUGAUGAAUJUGU  |
| 154654G03 | Arhgap26/MSS291522 | CAGGAGCAGAGGAACAGCAUCAUCA | UGAUGAUGCUGUCCUCUGCUCCUG   |
| 154654G05 | Arhgap26/MSS291523 | CGGGCACCGUCUUCGAUAAUGUUCA | UGAACAUUAUCGAAGACGGUGCCCG  |
| 154654G07 | Rhog/MSS225960     | CCUCCUAUGAGAACGUGAGGCACAA | UUGUGCCUCACGUUCUCAUAGGAGG  |
| 154654G09 | Rhog/MSS225961     | ACCCUCAGACCAACGUCUUCGUCAU | AUGACGAAGACGUUGGUCUGAGGGU  |
| 154654G11 | Rhog/MSS285643     | CCUGAGAGCCCAGCCUGAUACCCUA | UAGGGUAUCAGGCUGGGCUCUCAGG  |
| 154654H01 | Arhgap30/MSS213146 | CCACAGAUCCGACCCUACCAUACUA | UAGUAUGGUAGGGUCGGAUCUGUGG  |
| 154654H03 | Arhgap30/MSS213147 | GGAGGUUCGAGUGCAGUCCAUGUUU | AACAAUGGACUGCACUCGAACCUCC  |
| 154654H05 | Arhgap30/MSS213148 | CCUGUCUCUGGAUGAUACUCAGUAU | AUACUGAGUAUCAUCCAGAGACAGG  |
| 154654H07 | Arhgap5/MSS202178  | UCGAGAGUUUCUGUCUACCACUAAA | UUUAGUGGUAGACAGAAACUCUCGA  |
| 154654H09 | Arhgap5/MSS273270  | GCGAUCCAUUUAGUGUGGAUCUCAU | AUGAGAUCACACUAAAUGGAUCGC   |
| 154654H11 | Arhgap5/MSS273271  | GCCGGAUCCUUUGAUUCCAUAUUCA | UGAAUAUGGAAUCAAAGGAUCCGGC  |
| 154656A01 | Arhgdia/MSS208259  | GAAGGAAGGUGUGGAGUACCGGAUA | UAUCCGGUACUCCACACCUUCCUUC  |
| 154656A03 | Arhgdia/MSS208260  | GGAGAGCUUCAAGAAACAGUCGUUU | AAACGACUGUUUCUUGAAGCUCUCC  |
| 154656A05 | Arhgdia/MSS208261  | GACUGACUACAUGGUCGGGAGCUAU | AUAGCUCCCGACCAUGUAGUCAGUC  |
| 154656A07 | Crmp1/MSS203237    | CCCGGUGGCAUUGAUGUCAACACUU | AAGUGUUGACAUCAUUGCCACCGGG  |
| 154656A09 | Crmp1/MSS203238    | CCAGGAAGAAAGGCCUCUUGUCUU  | AAGACAAGAGGGCCUUUCUCCUGG   |
| 154656A11 | Crmp1/MSS203239    | ACUGUCCCUACAGUACUGCUCAGAA | UUCUGAGCAGUACUGUAGGGACAGU  |
| 154656B01 | Bcr/MSS201314      | GGACUGUCAUCGACAUGAAUGGAAU | AUUCCAUAUCUGUCGAUGACAGUCC  |
| 154656B03 | Bcr/MSS201315      | CCCAGACCCUGCGGAUACUAUGUUA | UAACAUAGUAUCCGCAGGGUCUGGG  |
| 154656B05 | Bcr/MSS272842      | CCAGGCACUGAAGGCAGCCUUUGAU | AUCAAAAGGCUGCCUUCAGUGCCUGG |
| 154656B07 | Chn2/MSS245507     | CCCUGAAACUGUACUCCGAGACUU  | AAGUCUCGGAAGUACAGUUUCAGGG  |
| 154656B09 | Chn2/MSS245508     | CCAAUGACUGCCAGCCAGAUCUCAA | UUGAGAUCUGGCUGGCAGUCAUUGG  |
| 154656B11 | Chn2/MSS245509     | GCGCUACCUGAUGAUCCACCUGAAA | UUUCAGGUGGAUCAUCAGGUAGCGC  |
| 154656C01 | Diap1/MSS203555    | UGCCACUGACGAGAAGGACAAGUUU | AAACUUGUCCUUCUCGUCAGUGGCA  |
| 154656C03 | Diap1/MSS203556    | GCCAUCCUCUUAAGCUACAGUUCA  | UGAACUGUAGCUUGAAGAGGAUGGC  |
| 154656C05 | Diap1/MSS203557    | ACCUGCAGAAGAGCUUAGAUCAGAU | AUCUGAUCUAAGCUCUUCUGCAGGU  |
| 154656C07 | Dpysl2/MSS203240   | CCAACCACUCCAGACUUUCUCAACU | AGUUGAGAAAGUCUGGAGUGGUUGG  |
| 154656C09 | Dpysl2/MSS203241   | CCAGCUGACGGAUUCCAGAUUCUAU | AUAGAUCUGGGAAUCCGUCAGCUGG  |
| 154656C11 | Dpysl2/MSS203242   | GACUCCAGCCUCAUCAGCUAAGACA | UGUCUUAGCUGAUGAGGCUGGAGUC  |
| 154656D01 | Dlc1/MSS224945     | GCUUAUGAUGUGGCAGACAUGUUA  | UUAACAUGUCUGCCACAUCAUAAGC  |
| 154656D03 | Dlc1/MSS224946     | GCAGCCGCCUGAGCAUCUAUGAUAA | UUAUCAUAGAUGCUCAGGCGGCUGC  |
| 154656D05 | Dlc1/MSS224947     | GGUUGAUAUCAGUGCUCCCAUUCU  | AGAAUGGAGCACUGAUGAUCAACC   |
| 154656D07 | Ralbp1/MSS208646   | UGCAGAUCAGCAAUCGGGUCCUGUA | UACAGGACCCGAUUGCUGAUCUGCA  |
| 154656D09 | Ralbp1/MSS208647   | GGGCGGGAUAAAGGACUUAUCUAAA | UUUAGAUAAAGUCCUUUAUCCCGCCC |
| 154656D11 | Ralbp1/MSS208648   | GAGAUCAGGAGACAGGAGUUCUUU  | AAAGGAACUCCUGUCUCCUGAUCUC  |
| 155026A03 | Pkn1/MSS241556     | CCUAUCUGCUCAUCCACCAACCUGA | UCAGGUUGGUGGAUGAGCAGAUAGG  |
| 155026A04 | Pkn1/MSS282993     | CAGUCCCAAUGCAUCUCCAGGUGCU | AGCACCUGGAGAUGCAUUGGGACUG  |
| 154656E05 | Pkn1/MSS282994     | GAGCUGCCUUCAGAGACCCAGGAGA | UCUCCUGGGUCUCUGAAGGCAGCUC  |
| 154656E07 | Pkn2/MSS201191     | GGAUAAUUGUUGCUAGAUACAGAA  | UUCUGUAUCUAGCAACAAGUUAUCC  |
| 154656E09 | Pkn2/MSS201193     | CACUAGAGCAAAGGUUAAAUGAGCU | AGCUCAUUUAACCUUUGCUCUAGUG  |

|           |                              |                            |                            |
|-----------|------------------------------|----------------------------|----------------------------|
| 154656E11 | Pkn2/MSS272752               | CCGUCCAGACCAAUGAGCUGGCUUU  | AAAGCCAGCUCAUUGGUCUGGACGG  |
| 154656F01 | Srgap2/MSS204395             | ACAUGAAGGUCUGGAUGCUAUUGAA  | UUCAAUAGCAUCCAGACCUUCAUGU  |
| 154656F03 | Srgap2/MSS204396             | UCACAAGUAGAAGUGAACGACAUAA  | UUAUGUCGUUCACUUCUACUUGUGA  |
| 154656F05 | Srgap2/MSS274401             | GAAGCACCAAGGACCAGCAAUUUAA  | UUAAAUUGCUGGUCCUUGGUGCUUC  |
| 154656F07 | Rock1/MSS208676              | GCUGCUCAGCAAUUUGAAAUGAUU   | AAUCAUUUCAAAUUUGCUGAGCAGC  |
| 154656F09 | Rock1/MSS208677              | GCACGCCUAACUGACAAGCACCAAU  | AUUGGUGCUUGUCAGUUAGGCGUGC  |
| 154656F11 | Rock1/MSS276868              | CAGAAAUGCAGAACUUCAAACUJAA  | UUAAGUUUGAAGUUCUGCAUUUCUG  |
| 154656G01 | Srgap3/MSS281821             | CCGUGAACUGUUGGUAUCUGGUACU  | AGUACCAGAUACCAACAGUUCACGG  |
| 154656G03 | Srgap3/MSS281822             | CACGAUGUCUCUGAUCUCAUCGAUU  | AAUCGAUGAGAUCCAGAGACAUCGUG |
| 154656G05 | Srgap3/MSS281823             | GAGAGCCAACCAGCAGGAAACAGAA  | UUCUGUUUCCUGCUGGUUGGCUCUC  |
| 154656G07 | Cdc42/MSS247082              | CCUUUCUUGCUUGUUGGGACCCAAA  | UUUGGGUCCCAACAAGCAAGAAAGG  |
| 154656G09 | Cdc42/MSS247084              | GGUGCCUGAGUAACUCACCACUGU   | ACAGUGGUGAGUUUUCUCAGGCACC  |
| 154656G11 | Cdc42/MSS273586              | CAAGAACAAACAGAAGCCUAUUACU  | AGUAAUAGGCUUCUGUUUGUUCUUG  |
| 154656H01 | Rock2/MSS208679              | CCGGACCCAUGGAUCAGAGUAAUU   | AAUUUUCUCUGAUCCAUGGGUCCGG  |
| 154656H03 | Rock2/MSS208680              | CCUCGUCAACCUUAUGAGUAAUUU   | AUAAUUACUCAUAAGGUUGACGAGG  |
| 154656H05 | Rock2/MSS208681              | GCAGGAAACUCAGAAGCGUUGUCUU  | AAGACAACCGCUUCUGAGUUUCCUGC |
| 154656H07 | Rtkn/MSS208739               | CCACUGUUCACUAUCGUAUCAACA   | UGUUGAUGACGAUAGUGAACAGUGG  |
| 154656H09 | Rtkn/MSS208740               | CCCAAUCCAGAGGUUUCUACAGCA   | UGCUGUAGAAACCUCUGGAUUUGGG  |
| 154656H11 | Rtkn/MSS208741               | GCGCUUUGGCAGCUCUUCUUUGACA  | UGUCAAGAAGAGCUGCCAAAGCGC   |
| 154657A01 | Rac1/MSS237707               | CCGCAGACAGACGUGUUCUUAUUUU  | AAAUUAAGAACACGUCUGUCUGCGG  |
| 154657A03 | Rac1/MSS237708               | GGCGAAAGAGAUCCGUGCUGUCAAA  | UUUGACAGCACCGAUCUCUUUCGCC  |
| 154657A05 | Rac1/MSS237709               | GCCUGCUCAUACAGUUACACGACCAA | UUGGUCGUGUAACUGAUGAGCAGGC  |
| 154657A07 | RhoA/NM_016802.4_stealth_3   | CAUGCUCACGCGUCUGCCAUGAUU   | AAUCAUGGCAGACGCGUGGAGCAUG  |
| 154657A09 | RhoA/NM_016802.4_stealth_46  | CAGGGCGUGGAUGCGUUCUUGAGCA  | UGCUCAAGAACGCAUCCACGCCUCUG |
| 154657A11 | RhoA/NM_016802.4_stealth_652 | GACACCGAUGUUAUUAUGAUGUGUU  | AACACAUCAAUUAACAUCGGUGUC   |
| 154657B01 | Abi1/MSS272917               | CAAAGCAUAUACAACUCAAUUCUA   | UAGAGAUUGAGUUGUAUAUGCUUUG  |
| 154657B03 | Abi1/MSS272918               | CAUUGGCCAACAAUGUGCUCCAGCU  | AGCUGGAGCAAUUGUUGGCCAAUG   |
| 154657B05 | Abi1/MSS272919               | UGGAUGAUGUGGGCCAUGGAGUJAA  | UUAACUCCAUGGCCCAUCAUCAUCA  |
| 154657B07 | Arfip2/MSS233820             | CCAGAAACAGCUGGAGCAGACUCUU  | AAGAGUCUGCUCCAGCUGUUUCUGG  |
| 154657B09 | Arfip2/MSS233821             | UGAUGCACAAGCAGCUGCUGCUCUU  | AAGAGCAGCAGCUGCUUGUGCAUCA  |
| 154657B11 | Arfip2/MSS293819             | CCCGGACUGUGGAUCUGGAGCUAGA  | UCUAGCUCAGAUCCACAGUCCGGG   |
| 154657C01 | Rhob/MSS247025               | GCAUCAACUGCUGCAAGGUGCUAUG  | CAUAGCACCUUGCAGCAGUUGAUGC  |
| 154657C03 | Rhob/MSS247026               | ACACCGACGUCAUCCUUAUGUGCUU  | AAGCACAUAAAGGAUGACGUCGGUGU |
| 154657C05 | Rhob/MSS247027               | GCAUCCAAGCCUAUGACUACCUCGA  | UCGAGGUAGUCAUAGGCUUGGAUGC  |
| 154657C07 | Rhoc/MSS235982               | GAGAGCUGGCCAAGAUGAAACAGGA  | UCCUGUUUCAUCUUGGCCAGCUCUC  |
| 154657C09 | Rhoc/MSS235984               | UGAGAACUAUAUAGCCGACAUCGAA  | UUCGAUGUCGGCUAUUAUAGUUCUCA |
| 154657C11 | Rhoc/MSS273269               | GCGGGCCUACAGGUCCGGAAGAAUA  | UAUUCUUCGGACCUGUAGGCCCGC   |
| 154657D01 | Baiap2/MSS235629             | GAUGCAACAGAUGGCCAAUAGCAAU  | AUUGCUAUUGGCCAUCUGUUGCAUC  |
| 154657D03 | Baiap2/MSS235630             | GGCCAAGAACUCUGCUGCUUACCAU  | AUGGUAAGCAGCAGAGUUCUUGGCC  |
| 154657D05 | Baiap2/MSS272620             | CAGUGCCACCUGAGCUGGCACCAAU  | AAUGGUGCCAGCUCAGGUGGCACUG  |
| 154657D07 | Cdc42bpb/MSS211616           | GGGCAGAAUGGAAUAGAAGACUUUA  | UAAAGUCUUCUAUCCAUCUUGCCC   |
| 154657D09 | Cdc42bpb/MSS211618           | GCACAAGCAAUUGGUUGAGGCUUCA  | UGAAGCCUCAACCAAUUGCUUGUGC  |

|           |                                  |                            |                             |
|-----------|----------------------------------|----------------------------|-----------------------------|
| 154657D11 | Cdc42bpb/MSS278290               | CAAACUGAAGGAAUCGGAAGCGAAA  | UUUCGCUUCCGAUUCUUCAGUUUG    |
| 154657E01 | Cdc42SE2/NM_178626.3_stealth_559 | UGAGUGAAUUCUGGUUGUGUUUCAA  | UUGAAACACAACCAGAAUUCACUCA   |
| 154657E03 | Cdc42SE2/NM_178626.3_stealth_564 | GAAUUCUGGUUGUGUUUCAACUGCU  | AGCAGUUGAAACACAACCAGAAUUC   |
| 154657E05 | Cdc42SE2/NM_178626.3_stealth_570 | UGGUUGUGUUUCAACUGCUGUAUUG  | CAAUACAGCAGUUGAAACACAACCA   |
| 154657E07 | Pak4/MSS245585                   | GCAAAGACGUGAACUGCUCUCAAU   | AUUGAAGAGCAGUUCACGUCUUGC    |
| 154657E09 | Pak4/MSS245586                   | ACCGUGACAUCAAGAGUGACUCUAU  | AUAGAGUCACUCUUGAUGUCACGGU   |
| 154657E11 | Pak4/MSS291252                   | AACUAGCAGCUGGCAGGCCUUUAA   | UUAAAGGGCCUGCCAGCUGCUAGUU   |
| 154657F01 | Clip1/MSS226157                  | CCGAAGAAGGCUAGAGUCCAGUAAA  | UUUACUGGACUCUAGCCUUCUUCGG   |
| 154657F03 | Clip1/MSS226158                  | GGAGCUGAAGGUGUCCUUUAGCAA   | UUUGC UAAAAGGACACCUUCAGCUCC |
| 154657F05 | Clip1/MSS226159                  | GGCCAAGCUGAUGAAGAUCAUAAA   | UUUAAUGAUCUUCAUUCAGCUUGGCC  |
| 154657F07 | Copg/MSS249938                   | GGGUCUUUAACGAAACUCCAUCAA   | UUGAUGGGAGUUUCGUUAAAGACCC   |
| 154657F09 | Copg/MSS249939                   | ACCACGGAAGCAACUGAGGCUUUCU  | AGAAAGCCUCAGUUGCUUCCGUGGU   |
| 154657F11 | Copg/MSS249940                   | UCCUGCAUCGCUGAGGAUGUCAUCA  | UGAUGACAUCUCAGCGAUGCAGGA    |
| 154657G01 | Pard3/MSS234950                  | CGACAGCUGGCUUUCUCAAGCAGAA  | UUCUGCUUGAGAAAGCCAGCUGUCG   |
| 154657G03 | Pard3/MSS294614                  | GACCCAGCUUUAACUGGCCUUUCCA  | UGGAAAGGCCAGUUAAGCUGGGUC    |
| 154657G05 | Pard3/MSS294615                  | CGCAGGAUCUCACACUCCUCUACA   | UGUAGAGGGAGUGUGAGAUCUGCG    |
| 154657G07 | Pip5k1a/MSS237569                | GGGCUUCUCAGAAAAGACGAGAGAA  | UUCUCUCGUUCUUUCUGAGAAGCCC   |
| 154657G09 | Pip5k1a/MSS237570                | GGCGCUCUAUUCACAGCUAUGGAA   | UUCCAUAGCUGUGGAAUAGAGCGCC   |
| 154657G11 | Pip5k1a/MSS237571                | CCUCAGACUCCACCUUUGGAGGAAA  | UUUCCUCCAAGGUGGAGUCUGAGG    |
| 154657H01 | Cyfip1/MSS208988                 | CCAACCGGUUUGUUCGGACAGUAUU  | AAUACUGUCCGAACAAACCGGUUGG   |
| 154657H03 | Cyfip1/MSS208989                 | GGCAAUUGGACGGUUUGAAAGUGAA  | UUCACUUCAAACCGUCCA AUUGCC   |
| 154657H05 | Cyfip1/MSS277058                 | CAGGAUGUACUUGACACCCAGCGAA  | UUCGCUGGGUGUCAAGUACAUCUG    |
| 154657H07 | Cyfip2/MSS233795                 | CCAUCCUGUUCUGCCUCCUCAUGA   | UCUAUGAGGAGGCAGAACAGGAUGG   |
| 154657H09 | Cyfip2/MSS233796                 | GCCAUGUUCGGAGAAGCCAUCAUA   | UAUGAUUGGCUUCUCGGAACAUGGC   |
| 154657H11 | Cyfip2/MSS233797                 | ACAACAUCUGUGAGCAGAUGGUUCA  | UGAACCAUCUGCUCACAGAUGUUGU   |
| 154658A01 | Pip5k3/MSS207627                 | GCCUUCAUCAAGAGUCCUUAUUUA   | UAAUAAGGACUCUUGAUGAAGGC     |
| 154658A03 | Pip5k3/MSS207628                 | UGGCAGUGUUCAGGCCAAGUCUAUU  | AAUAGACUUGGCCUGAACACUGCCA   |
| 154658A05 | Pip5k3/MSS276330                 | CCGAAGAUGAUAGAUUCAUUCUGAA  | UUCAGAAUGAAUCUAUCAUCUUCGG   |
| 154658A07 | Prkci/MSS207677                  | GGACAAUGUACUGCUAGACUCUGAA  | UUCAGAGUCUAGCAGUACA UUGUCC  |
| 154658A09 | Prkci/MSS207678                  | GCAUCCCGGUUCUCUGUCUGUAAA   | UUUACAGACAGAGAACGCGGAUGC    |
| 154658A11 | Prkci/MSS207679                  | CCAAAGUACUGUUGGUUCGGUAAA   | UUUAACCGAACCAACAGUACUUGG    |
| 154658B01 | Fmnl1/MSS226608                  | UCCGACUUCAGAGUCUGGAUGCGUU  | AACGCAUCCAGACUCUGAAGUCGGA   |
| 154658B03 | Fmnl1/MSS226609                  | GGAAACAGACGUUGUUGCACUACUU  | AAGUAGUGCAACAACGUCUGUUUCC   |
| 154658B05 | Fmnl1/MSS286071                  | CAGAGACUUCGGAGCGCAUGAACA   | UGUUCAUGCGCUCGGAGUCUCUG     |
| 154658B07 | Fnbp1l/MSS210755                 | GGUAAUUCUCAGAUUUACAAGCAA   | UUGCUUGUAAAUCUGAGGAAUJACC   |
| 154658B09 | Fnbp1l/MSS210756                 | UGAGGCAUGGCUCUCUGAAGUUGAA  | UUCAACUUCAGAGAGCCAUGCCUCA   |
| 154658B11 | Fnbp1l/MSS210757                 | GCAGUAAAGGUGCAGUAACUUAUUAU | AUAUAAGUUACUGCACCUUUACUGC   |
| 154658C01 | Trip10/MSS246881                 | GCUGAGCGCCUAGAUCAGGACAUUA  | UAAUGUCCUGAUCUAGGCGCUCAGC   |
| 154658C03 | Trip10/MSS246882                 | ACGACUCACAGGUCCUAUCGAAUU   | AAUUCGAUGAGGACCUGUGAGUCGU   |
| 154658C05 | Trip10/MSS246883                 | UGGAGCAGGCUUAUGCUAAGCAACU  | AGUUGCUUAGCAUAAGCCUGCUCCA   |
| 154658C07 | Wasf1/MSS234749                  | CCCUACAGGGAUGAUGGUAAGGAA   | UUCCUACCAUCAUCCUGUAAGGG     |
| 154658C09 | Wasf1/MSS234750                  | ACCUGCCUGUAAUCAGUGACGCAA   | UUGCGUCACUGAUUACAGGCAGGGU   |

|           |                  |                            |                            |
|-----------|------------------|----------------------------|----------------------------|
| 154658C11 | Wasf1/MSS234751  | CCCUGGCAAAUUAUUAGACAACU    | AGUUGUCUAAUUAUUUUUGCCAGGG  |
| 154658D01 | Inpp5a/MSS238163 | UCGACUACUUCAACCAGGAUGUCUU  | AAGACAUCCUGGUUGAAGUAGUCGA  |
| 154658D03 | Inpp5a/MSS238164 | CCUCCAUGUCCCAUGUGGACAAAUU  | AAUUUGUCCACAUGGGACAUGGAGG  |
| 154658D05 | Inpp5a/MSS238165 | UCCAACUUAGUGGCCUGGGAGACAA  | UUGUCUCCCAGGCCACUAAGUUGGA  |
| 154658D07 | Wasf2/MSS216650  | CCUAGCGAUACAAGCGAGCUGGAU   | AUUCAGCUCGCUUGUAUCGCUAGG   |
| 154658D09 | Wasf2/MSS216651  | CCUCUUAACAUCUCAGUCCUUACA   | UGUAAGGACUGAGAUUGUUAAGAGG  |
| 154658D11 | Wasf2/MSS216652  | GCAGGACACCAAGGAUUAUCAUGAAA | UUUCAUGAUAUCCUUGGUGUCCUGC  |
| 154658E01 | Iqgap1/MSS219911 | GACCCUGUGGAUUAUUACAAGUCUU  | AAGACUUGUAAAUAUCCACAGGGUC  |
| 154658E03 | Iqgap1/MSS219912 | CCAACAAGAUGUUUCUGGGCGAUAA  | UUUUCGCCAGAAACAUCUUGUUGG   |
| 154658E05 | Iqgap1/MSS219913 | UGAACAAAGCCUUGUCUCAUGAAGAA | UUUCUCAUGAGACAAGGCUUGUUCA  |
| 154658E07 | Iqgap2/MSS285190 | CAGCAAACCCUGAACGCACUUAUA   | UAUUAAAGUGCGUUCAGGGUUUGCUG |
| 155026B07 | Iqgap2/MSS285191 | GAUGACCUUCAACCAACCAGUUUA   | UAAACUGGUUGGUUGAAGGUCAUC   |
| 154658E11 | Iqgap2/MSS285192 | CAUAGCUAUUAAUGAGGCCUAUUGAA | UUCAAUAGCCUCAUUAUAGCUAUG   |
| 154658F01 | Wasl/MSS292313   | GCAGUGGUGUCGCUUGUCUGGUUAA  | UUAACCAGACAAGCGACACCACUGC  |
| 154658F03 | Wasl/MSS292314   | GAACAAGAGCUAUACAUAACUUG    | CAAAGUUAUUGUAUAGCUCUUGUUC  |
| 154658F05 | Wasl/MSS292315   | GAGAUACUUGUCAAGUAGCUCUUA   | UUAAGAGCUACUUGACAAGUAUCUC  |
| 154658F07 | Abl2/MSS201506   | CCACUGAGAGUGACCCUAAUCUCUU  | AAGAGAUUAGGGUCACUCUCAGUGG  |
| 154658F09 | Abl2/MSS201507   | CCGACUUUGGUUUAAGUAGACUGAU  | AUCAGUCUACUUAACCAAAGUCGG   |
| 154658F11 | Abl2/MSS272920   | UACGUGACAGCUGAGAGCCGCUUA   | UAAAGCGGCUCUCAGCUGUCACGUA  |
| 154658G01 | Map3k4/MSS218531 | CCUCCUUCUCAGAGCAGAAGUGUA   | UACACUUCUGCUCUGAGGAAGGAGG  |
| 154658G03 | Map3k4/MSS218532 | GCUCGAGUCAGAGGAAGAUUCCAUA  | UAUGGAAUCUCCUCUGACUCGAGC   |
| 154658G05 | Map3k4/MSS218533 | GCCAGCAGGCAUUGUUUGACUUCUA  | UAGAAGUCAAACAUUGCCUGCUGGC  |
| 154658G07 | Mapk8/MSS218561  | GCGCCUACCGAGAACUAGUUCUUAU  | AUAAGAACUAGUUCUCGGUAGGCGC  |
| 154658G09 | Mapk8/MSS218563  | CCUCUUUCAGGAAGGGACUAUAUU   | AAUAUAGUCCCUUCCUGGAAAGAGG  |
| 154658G11 | Mapk8/MSS281895  | CAAGCACCUUCACUCUGCUGGAAUU  | AAUUCAGCAGAGUGAAGGUGCUUG   |
| 154658H01 | Ap2m1/MSS202076  | GACGGAGAGUUUGAACUCAUGAGAU  | AUCUCAUGAGUUCAAACUCUCCGUC  |
| 154658H03 | Ap2m1/MSS273197  | CAAGCAAGAGUGGUAAGCAGUCGAU  | AUCGACUGCUUACCACUCUUGCUUG  |
| 154658H05 | Ap2m1/MSS273198  | GCGACUCAGCAAGUUUGACUCUGAG  | CUCAGAGUCAACUUGCUGAGUCGC   |
| 154658H07 | Ddef1/MSS273948  | GACUACAACUCGCCACCACGUCCA   | UGGACGUGGUGGGCGAGUUUGUAGUC |
| 154658H09 | Ddef1/MSS273949  | ACGCGGCUGCACAAUCGAGGAACA   | UGUCCUGCAGUUUGUGCAGCCGCGU  |
| 154658H11 | Ddef1/MSS273950  | UCACGCUGCUGGAGGAGGCUCUAGA  | UCUAGAGCCUCCUCCAGCAGCGUGA  |
| 154659A01 | Nckap1/MSS284790 | CAGUGUACUCUUAGUGACCAGUUUAU | AUAACUGGUCACUAAGAGUACACUG  |
| 154659A03 | Nckap1/MSS284791 | GGCGUUGUAUUACUUUAUUUGUA    | UACAAAUGUAAAGUAAUACAACGCC  |
| 154659A05 | Nckap1/MSS284792 | GCAAUAGAAGGACACUGCAACAAUA  | UAUUGUUGCAGUGUCCUUCUUAUUGC |
| 154659A07 | Pak1/MSS237494   | GGAUUGGAUGGCUCUGUCAAGUUA   | UUAACUUGACAGAGCCAUCCAUUC   |
| 154659A09 | Pak1/MSS237495   | UGUGCCGAGAGUGUCUACAAGCUUU  | AAAGCUUGUAGACACUCUCGGCACA  |
| 154659A11 | Pak1/MSS237496   | GGGCAUUUAUGGCAAUUGAAAUGAUU | AAUCAUUUCAAUUGCCAUAUUGCCC  |
| 154659B01 | Rala/MSS225866   | GGUAACAAGUCAGAUCUAGAAGAU   | UAUCUUCUAGAUCUGACUUGUJACC  |
| 154659B03 | Rala/MSS225868   | ACAGAGCUGACCAGUGGAACGUUA   | UUAACGUUCCACUGGUCAGCUCUGU  |
| 154659B05 | Rala/MSS285599   | GCAGGAGGACUAUGCUGCAAUUAGA  | UCUAAUUGCAGCAUAGUCCUCCUGC  |
| 154659B07 | Ralb/MSS287585   | CCCACCAAAGCUGACAGUUACAGAA  | UUCUGUAACUGUCAGCUUUGGUGGG  |
| 154659B09 | Ralb/MSS287586   | CAUCACAGAGCACGAGUCUUUCACA  | UGUGAAAGACUCGUGCUCUGUGAUG  |



|           |                    |                            |                            |
|-----------|--------------------|----------------------------|----------------------------|
| 154659B11 | Ralb/MSS287587     | CAGCCGAGUUCAGGGAACAGAUUCU  | AGAAUCUGUUCCCUGAACUCGGCUG  |
| 154659C01 | Reps1/MSS208601    | GGAAAUACCGUAGAUAGGUACAGUA  | UACUGUACCCAUCUACGGUAUUJCC  |
| 154659C03 | Reps1/MSS208602    | CCAGUGGAUGCAGAUGGUCUAAUAA  | UUUUUAGACCAUCUGCAUCCACUGG  |
| 154659C05 | Reps1/MSS208603    | CCAUUCAGCCUGACCUAAACGGAUU  | AAUCCGUUUAGGUCAGGCUGAAUGG  |
| 154659C07 | Gna13/MSS204752    | CCAGCUGGGUGAGUCUGUAAAGUAU  | AUACUUUACAGACUCACCCAGCUGG  |
| 154659C09 | Gna13/MSS204753    | GGCAUCCAUGAGUACGACUUUGAAA  | UUUCAAGUCGUACUCAUGGAUGCC   |
| 154659C11 | Gna13/MSS274579    | UGGAGACAAGUUGAUGGCAUUUGAU  | AUCAAAUGCCAUCAACUUGUCUCCA  |
| 154659D01 | Rras/MSS276892     | CCUCCGGUCUGAAGCCUCCUCUUUC  | GAAAGAGGAGGCUUCAGACCGGAGG  |
| 154659D03 | Rras/MSS276893     | GACUUACUUUGAGGCCUCAGCCAAA  | UUUGGCUGAGGCCUCAAGUAAGUC   |
| 154659D05 | Rras/MSS276894     | GCGCUGUCCGGAAAUACCAGGAACA  | UGUUCUGGUUUUCCGGACAGCGC    |
| 154659D07 | Sh3glb1/MSS225755  | GCUAAUUGGGAGAGAGAGAAAUCA   | UUGAUUUCUCUCUCUCCAUUJAGC   |
| 154659D09 | Sh3glb1/MSS225757  | ACCAGUGCCAUAUGCUUUGUCAAAU  | AUUUGACAAAGCAUAUGGCACUGGU  |
| 155026B10 | Sh3glb1/MSS285450  | CAAUUACCUACUUAAGAACUUCUCAA | UUGAGAAGUUCUAAGUAGGUAAUUG  |
| 154659E01 | Gnaq/MSS204770     | CCCUUCCUAUCUGCCUACACAACAA  | UUGUUGUGUAGGCAGAUAGGAAGGG  |
| 154659E03 | Gnaq/MSS204772     | CCCUUUGACUUACAAAGUGUCAUUU  | AAAUGACACUUUGUAAGUCAAGGG   |
| 154659E05 | Gnaq/MSS274590     | CGCUUAGCGAAUAUGAUCAAGUUCU  | AGAACUUGAUCAUAUUCGCUAAGCG  |
| 154659E07 | Hip1/MSS238296     | ACUACACUGUCAAGCUGCUCUUCAA  | UUGAAGAGCAGCUUGACAGUGUAGU  |
| 154659E09 | Hip1/MSS238297     | UGGCUGCAUCCAAGGUGAAAGCGAA  | UUCGCUUUCACCUUGGAUGCAGCCA  |
| 154659E11 | Hip1/MSS277974     | CAGAAGAUUUAGUGAGCUUCUGCA   | UGCAGAAGCUCACUAAUAUCUUCUG  |
| 154659F01 | Traf2/MSS212078    | CCCUGAGUAACAAGGUGCAACAGCU  | AGCUGUUGCACCUUGUUACUCAGGG  |
| 154659F03 | Traf2/MSS212079    | GGACCAUGUUAGAGCAUGCAGCAA   | UUUGCUGCAUGCUCUAAACUUGGUCC |
| 154659F05 | Traf2/MSS212080    | GGAAGAUUCUCUGACUUCACCAGAAA | UUUCUGGUGAAGUCAGAGAUUJCC   |
| 154659F07 | Amph/MSS211646     | GGAAAGCACGGAGCUUGCAUUCAGU  | ACUGAUUGCAAGCUCCGUGCUUJCC  |
| 154659F09 | Amph/MSS211647     | GCGCAGCAGGAAGCUUGUGGAUUJAU | AUAAUCCACAAGCUUCCUGCUGCGC  |
| 154659F11 | Amph/MSS211648     | GGAUAAUUUAGCAGCAAUCAAGGUA  | UACCUUUUAUUGCUGCUAAAUAUCC  |
| 154659G01 | Igf1r/MSS205378    | ACCACGGUAGCUGACACCUACAUA   | UAUUGUAGGUGUCAGCUACCGUGGU  |
| 154659G03 | Igf1r/MSS275035    | UCCUGAAGGGCAAUCUGCUUAUUAA  | UUAAUAAGCAGAUUGCCCUUCAGGA  |
| 154659G05 | Igf1r/MSS275036    | CGGAAAGAUUGUACUUUGCUUUCAAU | AUUGAAAGCAAAGUACAUCUUJCCG  |
| 154659G07 | Kif1a/MSS205763    | CCGAGACUCCGUUUUGACAUGGCUU  | AAGCCAUGUCAAUACGGAGUCUCGG  |
| 154659G09 | Kif1a/MSS205764    | GAGCUGGAAGCCAAUGGCGAUUACA  | UGUAAUCGCCAUUGGCUUCCAGCUC  |
| 154659G11 | Kif1a/MSS205765    | GAGGUGACCAAGUCCUUCAUUCGAAU | AUUCGAUGAAGGACUUGGUCACCUC  |
| 154659H01 | Ddef2/MSS277636    | GAACAGAGAGGAACGGGAACCUCUA  | UAGAGGUJCCCGUJCCUCUCUGUUC  |
| 154659H03 | Ddef2/MSS277637    | GAGAAGAAGUGUUUCGACCUCAUAU  | AUAUGAGGUCGAAACACUUCUUCUC  |
| 154659H05 | Ddef2/MSS277638    | CAGACUUAGGAAGCGCGUUUCUGAA  | UUCAGAAACGCGCUUCCUAAGUCUG  |
| 154659H07 | Atp6v1e1/MSS202278 | UAAGCACAUGAUGGCUUUCAUUGAA  | UUCAAUGAAAGCCAUCAUGUGCUUA  |
| 154659H09 | Atp6v1e1/MSS202279 | GAAAUAGCUGGUGGCGUUGAGAUCU  | AGAUCUCAACGCCACCAGCUAUJUC  |
| 154659H11 | Atp6v1e1/MSS273322 | AGCAGAGACUCAGUAAGGUGGUAAA  | UUUACCACCUUJACUGAGUCUCUGCU |
| 154660A01 | Kif5a/MSS205791    | CCUCCGGGAUGAGAUUAAUGAGAAA  | UUUCUCAUUAAUCUCAUCCCGGAGG  |
| 154660A03 | Kif5a/MSS205792    | ACAACCUJCGCAAGCUGUUCGUUCA  | UGAACGAACAGCUUGCGAAGGUUGU  |
| 154660A05 | Kif5a/MSS275221    | GAUGAGAACCUUGAAUJCCACAUUA  | UAAUGUGGAAUUCAGGUUCUCAUC   |
| 154660A07 | Macf1/MSS201569    | GGAGAACCAACUUCUGCAUCUAAA   | UUUAGAUGCAGAAAGUUGGUUJCC   |
| 154660A09 | Macf1/MSS272959    | CAGGCUUUAGUUGACUGGUUGUACA  | UGUACAACCAGUCAACUAAAGCCUG  |

|           |                               |                            |                            |
|-----------|-------------------------------|----------------------------|----------------------------|
| 154660A11 | Macf1/MSS272960               | GAGUUCAGGAAAGCUUCAAGAAUA   | UAUUCUUGAAGCUUUCUGGAACUC   |
| 154660B01 | Bin1/MSS220005                | GAUGACGCAUUUGUCCUGAGAUCA   | UGAUCUCAGGGACAAAUGCGUCAUC  |
| 154660B03 | Bin1/MSS220006                | CCUGGCAGGGAUGAAGCAAACAAGA  | UCUUGUUUGCUUCAUCCUGGCCAGG  |
| 154660B05 | Bin1/MSS282617                | UCGGACCUAUCUGGCUUCUGUUAAA  | UUUAACAGAAGCCAGAUAGGUCCGA  |
| 154660B07 | Mtap1a/MSS206790              | CCUCCACUCUGACACUCCAACGUUU  | AAACGUUGGAGUGUCAGAGUGGAGG  |
| 154660B09 | Mtap1a/MSS206791              | CCACUCUGGAGAUCAUGAAGCUAAU  | AUUAGCUUCAUGAUCUCCAGAGUGG  |
| 154660B11 | Mtap1a/MSS275827              | CAGAACACAGAAGCAAGGUUGAUAA  | UUAUCAACCUUGCUUCUGUGUUCUG  |
| 154660C01 | Cask/MSS202616                | GGCCUUACUUCAGACUCAUGAUGUA  | UACAUCAUGAGUCUGAAGUAAGGCC  |
| 154660C03 | Cask/MSS202617                | CCUUCAGUGUUGUACGGCGAUGUAU  | AUACAUCGCCGUACAACACUGAAGG  |
| 154660C05 | Cask/MSS202618                | GGAGCGGGAUCGUUAUGCCUACAAA  | UUUGUAGGCAUAACGAUCCCGCUCC  |
| 154660C07 | Cblb/MSS209651                | GGUCUUGUGAUAAUGGUCAUUGUAU  | AUACAAUGACCAUUAUCACAAGACC  |
| 154660C09 | Cblb/MSS209652                | GGAUUCUCACAAAGCUGUCCCUAAU  | AUAAGGGACAGCUUUGUGAGAUUCC  |
| 154660C11 | Cblb/MSS277402                | CGAAGCGAGCGAUCCGGCUCUUUAA  | UUAAAGAGCCGGAUCGCUCGCUUCG  |
| 154660D01 | Ndel1/MSS234683               | ACUCUGGACUGUGAGAAGAUGGAUU  | AAUCCAUCUUCUCACAGUCCAGAGU  |
| 154660D03 | Ndel1/MSS234685               | GAACGAAAUGCAUUCUJAGAAAGUG  | CACUUUCUAAAGAAUGCAUUUCGUUC |
| 154660D05 | Ndel1/MSS294501               | CAACAGGAAGUGACCCGCAAGUCUG  | CAGACUUGCGGGUCACUCCUGUUG   |
| 154660D07 | Pam/MSS207392                 | CCAGUGUUUCAAGACUGACACAAA   | UUUGGUGUCAGUCUUGAAACACUGG  |
| 154660D09 | Pam/MSS207393                 | GAGUACUGGGAAGACUCCGAGGAAA  | UUUCCUCGGAGUCUCCAGUACUC    |
| 154660D11 | Pam/MSS207394                 | CCAGCAUGGACACUGUCCACCAUUAU | AUAUGGUGGACAGUGUCCAUGCUGG  |
| 154660E01 | Cd2ap/MSS273555               | CAGAGAAGAAAGCUUUCUUCUAAA   | UUUJAGAGGGAAAGCUUUCUUCUCUG |
| 154660E03 | Cd2ap/MSS273556               | GAUGCCUUUGUAGCCAGGAACUCAA  | UUGAGUCCUGGCUACAAAGGCAUC   |
| 154660E05 | Cd2ap/MSS273557               | CCAAGGAUGACAAUUUGCCCAUCAA  | UUGAUGGGCAAUUUGUCAUCCUJGG  |
| 154660E07 | Eps15/MSS203951               | CCCUUAAACUGAAUGAUCCAUUUCA  | UGAAAUGGAUCAUUCAGUUUAAGGG  |
| 154660E09 | Eps15/MSS203952               | CCCAGGCAAUGAUAGUCCCAAAGAA  | UUCUUUGGGACUAUCAUUGCCUGGG  |
| 154660E11 | Eps15/MSS203953               | AGAUGAAGUUCAAAGGGAGAGUAUU  | AAUACUCUCCUUUGAACUUAUCU    |
| 154660F01 | Pdgfrb/MSS207503              | GAGAGUGACGGUGGCUACAUGGAUA  | UAUCCAUGUAGCCACCGUCACUCUC  |
| 154660F03 | Pdgfrb/MSS207504              | GAGCAAGGAUGAAUCUUAUGAUUAC  | GUAUUCUUAUGAUUCAUCCUUGCUC  |
| 154660F05 | Pdgfrb/MSS207505              | GCCUCUACACCACUUUGAGUGAUGU  | ACAUCACUCAAGUGGUGUAGAGGC   |
| 154660F07 | Ptprf/MSS237674               | GCCAACCAUCAUCCAGGAUGUCAU   | AUGACAUCCUGGAUGAUGGGUJGGC  |
| 154660F09 | Ptprf/MSS237675               | CGCCAUGCCGU AUGUGAAAUGGAU  | AUCCAUUUCACAUACGGCAUGGGCG  |
| 154660F11 | Ptprf/MSS237676               | GCACUGAGACCUAUGGCCUCAUUCA  | UGAAUGAGGCCAUAGGUCUCAGUGC  |
| 154660G01 | Exoc1/MSS229985               | GAAGACCUGGAUGGAGGCUCGUUAU  | AUAACGAGCCUCCAUCCAGGUCUUC  |
| 154660G03 | Exoc1/MSS229986               | GGAGGUGGACCAGAUUGAACUGAAA  | UUUCAGUUCAAUCUGGUCCACCUCC  |
| 154660G05 | Exoc1/MSS229987               | GGUCGACGCCAAAGAUGCCAUCAAA  | UUUGAUGGCAUCUUUGGCGUCGACC  |
| 154660G07 | Gna12/MSS204749               | CCAUCGUACAACAACAGCUCUUCUU  | AAGAAGAGCUUGUUGUUGACGAUGG  |
| 154660G09 | Gna12/MSS204750               | GGGAAUCGUGGAACAUGACUUCGUU  | AACGAAGUCAUGUCCACGAUJCCC   |
| 154660G11 | Gna12/MSS204751               | GGAGAAGGUGAAGUCUGUGAGCAUU  | AAUGCUCACAGACUUCACCUUCUCC  |
| 154660H01 | Rheb/NM_053075.3_stealth_184  | CCUCAUUGACAAUUCAGUUUGUUGA  | UCAACAAACUGAAUUGUCAUAGAGG  |
| 154660H03 | Rheb/NM_053075.3_stealth_478  | GAAUAAGAAGGACCUGCAUAUGGA   | UCCAUAUGCAGGUCCUUCUUAUUUC  |
| 154660H05 | Rheb/NM_053075.3_stealth_1013 | UACUUAUAACUAGGCUUCAUAUAU   | AUAUAUUGAAGCCUAGUUAUAUGUA  |
| 154660H07 | Scrib/MSS200606               | GACCCUACAGAUGAGGGCAUCUUA   | UAAAGAUGCCUCAUCUGUAGGGUC   |
| 154660H09 | Scrib/MSS200607               | CCAGCCAUGUGAAGCAGGCGUAUA   | UAUACGCCUGCUUCACAUJGGCUGG  |



|           |                                 |                            |                            |
|-----------|---------------------------------|----------------------------|----------------------------|
| 154660H11 | Scrib/MSS272416                 | CAAGGAGAAAGAGUUGGCCAGUCA   | UUGACUGGCCAACUCUUUCUCCUUG  |
| 154661A01 | Sept7/MSS214988                 | GCACAGCACAAAGAAUUGAGGAAA   | UUUCCUCUAAUUCUUUGUGCUGUGC  |
| 154661A03 | Sept7/MSS214989                 | GAGUGAACAGACGUCAGAUGCCUGA  | UCAGGCAUCUGACGUCUGUUCACUC  |
| 154661A05 | Sept7/MSS214990                 | GCCAACCUCUCCAAAUCAAGUGUACA | UGUACACUUGAUUUUGGGAGGUUGGC |
| 154661A07 | Dlg3/MSS284974                  | CAGGACAGGGAUGAUUGAGUCUAAU  | AUUAGACUCAAUCAUCCUGUCCUG   |
| 154661A09 | Dlg3/MSS284975                  | GAGACUGCAGCAAGCACAAACUUUAU | AUAAAGUUGUGCUUGCUGCAGUCUC  |
| 154661A11 | Dlg3/MSS284976                  | CAGCCUAUCGGUGAAUGGCAGUGAU  | AUCACUGCCAUUCACCGAUAGGCUG  |
| 154661B01 | Snap23/MSS209234                | GGCAGCAUCCUAGGCAACCUAAAGA  | UCUUUAGGUUGCCUAGGAUGCUGCC  |
| 154661B03 | Snap23/MSS209236                | GACAACUCACCUAGCAAUGUAGUAU  | AUACUACAUUGCUAGGUGAGUUGUC  |
| 154661B05 | Snap23/MSS277154                | CAGUGGUGGAUACAUUAAACGUUAU  | UAUACGUUUAUGUAUCCACCACUG   |
| 154661B07 | Tsc2/MSS212132                  | CCGCUGGACUACAAGUGCAACCUAU  | AUAGGUUGCACUUGUAGUCCAGCGG  |
| 154661B09 | Tsc2/MSS212134                  | CCCUCCAUGAAGACCUCCAUGAAA   | UUUCAUGGAGGUCUUCAUUGGAGGG  |
| 154661B11 | Tsc2/MSS278551                  | CAGAGACCUGAAUCCUCUCUCUUA   | UUAAGAGAGAGGAUUCAGGUCUCUG  |
| 154661C01 | Dlgap4/MSS279341                | CAGCUGUCCAUUGAGGACAUCAGCA  | UGCUGAUGUCCUCAAUUGGACAGCUG |
| 154661C03 | Dlgap4/MSS279342                | CAGCCAAAUCCAAGGCGGCAGUGAG  | CUCACUGCCGCCUUGGAUUUGGCUG  |
| 155023G01 | Dlgap4/MSS279343                | CAAGCAGCGUCAGGAGGCCAGAAAAG | CUUUCUGGCCUCCUGACGCUGCUUG  |
| 154661C07 | Git1/MSS211304                  | GCACCAUGAACUGGCAGAAAGGCUA  | UAGCCUUUCUGCCAGUUCUAGGUGC  |
| 154661C09 | Git1/MSS211305                  | CCAGCACCGAAGACGUCAUCCUAAA  | UUUAGGAUGACGUCUUCGGUGCUGG  |
| 154661C11 | Git1/MSS278162                  | CCAAAGACCUCAGCAAGCAACUGCA  | UGCAGUUGCUUGCUGAGGUCUUUGG  |
| 154661D01 | Tubb3/NM_023279.2_stealth_752   | CCACCUCUCCUUCGAUCCUUGGUA   | UGACCAGGGAAUCGAAGGGAGGUGG  |
| 154661D03 | Tubb3/NM_023279.2_stealth_1508  | CCAGCUCAUUAAGGCUCCCAGGUUA  | UAACCUGGGAGCCCUAUUGAGCUGG  |
| 154661D05 | Tubb3/NM_023279.2_stealth_1605  | CCUCUGUAUUUAUGUUGCUUAUUCG  | CGAAUAAGCAACAUAUAAUACAGAGG |
| 154661D07 | App/MSS202133                   | UCAGGAUUUGAAGUCCGCCAUCAAA  | UUUGAUGGCGGACUUCAAAUCUGA   |
| 154661D09 | App/MSS202134                   | GACCAGGUUCUGGGCUGACAAACAU  | AUGUUUGUCAGCCCAGAACCUGGUC  |
| 154661D11 | App/MSS202135                   | GCGGAUGGAUGUUUGUGAGACCCAU  | AUGGGUCUCACAAACAUCAUCCGC   |
| 154661E01 | Git2/MSS218579                  | GGGCAGACAGAAAUJAGCUCGGUUU  | AAACCGAGCUAAUJUCUGUCUGCCC  |
| 154661E03 | Git2/MSS218580                  | CAUGCUCUGGCAAGGUGAUGGCUUA  | UAAGCCAUCACCUUGCCAGAGCAUG  |
| 154661E05 | Git2/MSS218581                  | UCAUGAGUGGGAGGCGGAAAGCUAA  | UUAGCUUUCGCCUCCCACUCAUGA   |
| 154661E07 | Gripap1/MSS225731               | UCAGCAACCUGAAGCAGGAGGUAAA  | UUUACCUCUGCUUCAGGUUGCUGA   |
| 154661E09 | Gripap1/MSS225732               | UCGAGGAGCUGGUUCUGUCUGAGAU  | AUCUCAGACAGAACCAGCUCCUCGA  |
| 154661E11 | Gripap1/MSS225733               | GGCAUCUGAGUACAGCAUCGUCAA   | UUGACGAUGCUGUAACUCAGAUGCC  |
| 154661F01 | Arf3/MSS235970                  | GCAAGAAGGAGAUGCGCAUCCUGAU  | AUCAGGAUGCGCAUCUCCUUCUUGC  |
| 154661F03 | Arf3/MSS235971                  | ACAGCAAUGAUCGGGAGCGAGUGAA  | UUCACUCGCUCCCGAUCAUUGCUGU  |
| 154661F05 | Arf3/MSS235972                  | CCAGAACACCCAAGGCUUGAUUUU   | AAAUUCAAGCCUUGGGUGUUCUGG   |
| 154661F07 | Arpc1b/NM_023142.2_stealth_185  | CCAACAACCAUGAGGUGCACAUCUA  | UAGAUGUGCACCUCAUGGUUGUUGG  |
| 154661F09 | Arpc1b/NM_023142.2_stealth_887  | CGGGCCACGACUGCUUCCCGGUGCU  | AGCACCGGGAAGCAGUCGUGGCCCG  |
| 154661F11 | Arpc1b/NM_023142.2_stealth_1125 | CAAGUGCUCACAGUUCUGCACUACA  | UGUAGUGCAGAACUGUGAGCACUUG  |
| 154661G01 | Hip1r/MSS219893                 | UCAUCCUGGGCAGCAUCAUGAGAA   | UUCUCAUGAUGCGUGCCCAGGAUGA  |
| 154661G03 | Hip1r/MSS219894                 | CCACUACACAGUGAAGCUCAUGUUU  | AAACAUGAGCUUCACUGUGUAGUGG  |
| 154661G05 | Hip1r/MSS219895                 | GACCAGUAUGGACACCUGGUGAAUA  | UAUUCACCAGGUGUCCAUAUCUGGUC |
| 154661G07 | Irs2/MSS222825                  | GGCGAACUCUAUGGGUACAUGAGCA  | UGCUCAUGUACCCAUAAGAUUCGCC  |
| 154661G09 | Irs2/MSS222826                  | GGUUUCCAGAACGGCCUCAACUAUA  | UAUAGUUGAGGCCGUUCUGGAAACC  |

|           |                   |                              |                             |
|-----------|-------------------|------------------------------|-----------------------------|
| 154661G11 | Irs2/MSS284072    | CAUCGGGCUUGAAGCGGCUAAGUCU    | AGACUUAGCCGCUUCAAGCCCGAUG   |
| 154661H01 | Bcar1/MSS273814   | GACCGCACCUUGCAUGCCAAGCUUA    | UAAGCUUGGCAUGCAAGGUGCGGUC   |
| 154661H03 | Bcar1/MSS273815   | ACAGAUGCAGUGGACGCCUUCUUA     | UGAAGAAGGCGUCCACUGCAUCUGU   |
| 154661H05 | Bcar1/MSS273816   | CCUCAAGAUUCUGGUUGGCAUGUAU    | AUACAUGCCAACCAGAAUCUUGAGG   |
| 154661H07 | Itgav/MSS205547   | GGUGUGGAUCGAGCUGUCUUAUACA    | UGUAUAAGACAGCUCGAUCCACACC   |
| 154661H09 | Itgav/MSS205548   | CAGACCCGUUGUCACUGUAAAUGCU    | AGCAUUUACAGUGACAACGGGUCUG   |
| 154661H11 | Itgav/MSS205549   | CCAAGUGGCAGAAAUCAUAUCUAAA    | UUUAGAUUGAUUUUCUGCCACUUGG   |
| 154662A01 | Capn1/MSS236087   | ACCAAACUGGAAAUCUGCAACCUUA    | UAAGGUUGCAGAUUUCAGUUUGGU    |
| 154662A03 | Capn1/MSS236088   | CCCUGAUGAGAAAGUUCUCUCUGAA    | UUCAGAGAGAACUUUCUCAUCAGGG   |
| 154662A05 | Capn1/MSS236089   | CCGAUAUCCGUGAUUUAGAGGCUAU    | AUAGCCUCUAAAUCACGGAUUUCGG   |
| 154662A07 | Ccdc88a/MSS201023 | CCCAGGAAGUGAAGUUGUUACUCUA    | UAGAGUAACAACUUCACUUCUGGG    |
| 154662A09 | Ccdc88a/MSS201024 | ACACCAAGCACUCAAGGAAAGAUAA    | UUUUCUUUCUUGAGUGCUUGGUGU    |
| 154662A11 | Ccdc88a/MSS201025 | GGCCAGGUCAGUAAGUGGAAAGACU    | AGUCUUUCCACUUCUGACCCUGGCC   |
| 154662B01 | Itgb5/MSS205565   | GGACUAUCCAUCGCUUGCCUUGCUU    | AAGCAAGGCAAGCGAUGGAUAGUCC   |
| 154662B03 | Itgb5/MSS205566   | GCCUACA AUUGCACAU GCGGUCUGUA | UACAGCCGCAUGUGCAAUUGUAGGC   |
| 154662B05 | Itgb5/MSS275142   | CAGGAGGUCUGUCUUUGCUUCUACA    | UGUAGAAGCAAAGCACAGCCUCCUG   |
| 154662B07 | Kif3a/MSS205781   | CAGGACUCCUAGGAGGGAACUCAA     | UUGAGUCCCUCCUAAGGAGUCCUG    |
| 154662B09 | Kif3a/MSS205782   | GGGUAAGAUCAGACCCAGAGGUUA     | UAACCUCUGGGUCUGAUCUUUACCC   |
| 154662B11 | Kif3a/MSS205783   | UCGGUGCGACUAAUUGAACGAGCA     | UGCUCGUUCAUUAUAGUCGCACCGA   |
| 154662C01 | Cd47/MSS205575    | GAGAAAGGAGGUUGCAAUUAGUUU     | AAACUAAUUUGCAACCUCCUUUCUC   |
| 154662C03 | Cd47/MSS205576    | GAUCAUAGCUCUAGCAGAACUACUU    | AAGUAGUUCUGCUAGAGCUAUGAUC   |
| 154662C05 | Cd47/MSS275144    | CGCGAUGCCAUGGUGGGAAACUACA    | UGUAGUUUCCACCAUGGCAUCGCG    |
| 154662C07 | Clip2/MSS219153   | GAAGACCGGUGUGGUGCGAUUUGUU    | AACAUUUCGCACCACACCGGUCUUC   |
| 154662C09 | Clip2/MSS282161   | CGGGUGGAAGAAGAAUCCAUCACCA    | UGGUGAUGGAUUUCUUCUCCACCCG   |
| 154662C11 | Clip2/MSS282162   | UGCCCGGCUCUACAGGGCAUCUUA     | UGAAGAUGCCUGUAGAGCCGGGCA    |
| 154662D01 | Kif3b/MSS275218   | CAGCAGGAGGUAGACAUCAAGACCA    | UGGUCUUGAUGUCUACCUCUGCUG    |
| 154662D03 | Kif3b/MSS275219   | AGCUAAAGCUCUAGCAUCUUAUUUAU   | AUAUAAGAUGCUUUGAGCUUUAGCU   |
| 154662D05 | Kif3b/MSS275220   | CAGCUCACGGUCGCAUGCAAUCUUU    | AAAGAUUGCAUGCGACCGUGAGCUG   |
| 154662D07 | Llg1/MSS237065    | GCCACACAGUCUGUGGACAACGUUU    | AAACGUUGUCCACAGACUGUGUGGC   |
| 154662D09 | Llg1/MSS237066    | GCGAGAAGCUUAAGCAGGAGCUCUU    | AAGAGCUCUGCUUAAGCUUCUCGC    |
| 154662D11 | Llg1/MSS275350    | CAGAAGGUUGCGCUUUGCAAGUACA    | UGUACUUGCAAAGCGCAACCUUCUG   |
| 154662E01 | Ctnna1/MSS202658  | UCCUGGAGACCAAUUGUCCUCUUAU    | AAUAGAGGGACAUUGGUCUCCAGGA   |
| 154662E03 | Ctnna1/MSS202659  | GCUGAAAGUUGUGGAAGAUGGUUAU    | UAUACCAUCUCCACAACUUUCAGC    |
| 154662E05 | Ctnna1/MSS273499  | CAAUAGUAAAGGGCCGUCUAAUAAA    | UUUUAUAGACGGCCUUUACUUAUUG   |
| 154662E07 | Dixdc1/MSS221126  | GCACCUGCACUAAGGUGCUCUUAUUU   | AAAUAGAGCACCUUAGUGCAGGUGC   |
| 154662E09 | Dixdc1/MSS221127  | UCGGAUGCAUCAGACGUCAGCGAAA    | UUUCGCUGACGUCUGAUGCAUCCGA   |
| 154662E11 | Dixdc1/MSS221128  | GCGGGCUCUUGUGCAGCAAUAUGAA    | UUCAUAUUGCUGCACAAGAGCCCGC   |
| 154662F01 | Map2k7/MSS218514  | UGAUGGACCUGGAUGUAGUACUCAA    | UUGAGUACUACAUCAGGUCCAUCA    |
| 154662F03 | Map2k7/MSS218515  | CCAGUCAUUUGUCAAAAGACUGCCUU   | AAGGCAGUCUUUGACAAAUGACUGG   |
| 154662F05 | Map2k7/MSS281882  | CCAGCGUUAUCAGGCAGAAUCAAU     | AUUGAUUUCUGCCUGAUAAACGUCUGG |
| 154662F07 | Map3k12/MSS218522 | GACCUGAAGUCACCCAACAUGC UAA   | UUAGCAUGUUGGGUGACUUCAGGUC   |
| 154662F09 | Map3k12/MSS218523 | GACUCAGACUGUGACAGCACUGAAU    | AUUCAGUGCUGUCACAGUCUGAGUC   |

|           |                    |                             |                             |
|-----------|--------------------|-----------------------------|-----------------------------|
| 154662F11 | Map3k12/MSS281884  | CAACACUGAUGAGCGACCAGAUGAA   | UUCAUCUGGUCGCUCAUCAGUGUUG   |
| 154662G01 | Rab4a/MSS208367    | GGCUUUCAUGCAGUGUGCAAGGAAA   | UUUCCUUGCACACUGCAUGAAAAGCC  |
| 154662G03 | Rab4a/MSS208368    | GGAAAUGC GG AACUGGCAAUUCU   | AAGAUUUGCCAGUUC CCGCAUUUC   |
| 154662G05 | Rab4a/MSS276696    | GGAGUGGAAUUUGGCUCA AAGAUAA  | UUUUCUUUGAGCCAAA UUCACUCC   |
| 154662G07 | Map4k5/MSS223262   | GGCUGCCACAAAUGCUGCAUAGUUA   | UAACUAUGCAGCAUUUGUGGCAGCC   |
| 154662G09 | Map4k5/MSS223263   | CCCACGCAAUCAUUCGUCAUACCAU   | AUGGUAUGACGAAUGAUUGCGUGGG   |
| 154662G11 | Map4k5/MSS223264   | GGAAAUGUACGUGGCUCUACGUCAU   | AUGACGUAGAGCCACGUACA UUUCC  |
| 154662H01 | Mapk8ip3/MSS220022 | CAUCCGCUGCAUGGCUGUUGUGAAU   | AUUCACAACAGCCAUGCAGCGGAUG   |
| 154662H03 | Mapk8ip3/MSS220023 | GCCACAUGAAGAGGACUCUAGCAAU   | AUUGCUAGAGUCCUCUUCAUGUGGC   |
| 154662H05 | Mapk8ip3/MSS220024 | AGGAAAUGUGCUGGCCACUCUCAAU   | AUUGAGAGUGGCCAGCACAUUCCU    |
| 154662H07 | Raph1/MSS293907    | CAAUCUCACUGUGGCUACAGUUUA    | UAAACUGUAGCCACAGUGAGAUUUG   |
| 154662H09 | Raph1/MSS293908    | CCACUCUA AUCAGUCUGACAGCGGA  | UCCGCUGUCAGACUGAUUAGAGUGG   |
| 154662H11 | Raph1/MSS293909    | CAGCAUGGAUUCUCUGGAU AUUGAU  | AUCAAUAUCCAGAGAAUCCAUGCUG   |
| 154663A01 | Rela/MSS208587     | GCAGUAUCCA UAGCUUCCAGAACCU  | AGGUUCUGGAAGCUAUGGAUACUGC   |
| 154663A03 | Rela/MSS208588     | GCAGAAAGAAGACAUUGAGGUGUAU   | AUACACCUCAAUGUCUUCUUCUGC    |
| 154663A05 | Rela/MSS276820     | CCGAGCUC AAGAUCUGCCGAGUAAA  | UUUACUCGGCAGAU CUUGAGCUCGG  |
| 154663A07 | Myo18a/MSS221405   | CCUUCUGACGAUGGCAGCUUGAAGA   | UCUUCAAGCUGCCAUCGCUGAGAAGG  |
| 154663A09 | Myo18a/MSS221406   | UCGAGUCC CUGAGCUGGUGACUAAA  | UUUAGUCACCAGCUCAGGGACUCGA   |
| 154663A11 | Myo18a/MSS221407   | CAGCUGUA AAGGCACGGAAAGCGAU  | AUCGCUUUCCGUGCCUUUACAGCUG   |
| 154663B01 | Sh3kbp1/MSS226688  | GGAGAU AUAGUGACUCUCAUAUA    | UAUUGAUGAGAGUCACUAUAUCUCC   |
| 154663B03 | Sh3kbp1/MSS226689  | ACUGGAUUUACAGAAGCCUUCAGUU   | AACUGAAGGCUUCUGUAAA UCCAGU  |
| 154663B05 | Sh3kbp1/MSS226690  | GGUUGCAGAU GGAAGUGAACGACAU  | AUGUCGUUCACUCCAUCUGCAACC    |
| 154663B07 | Smg1/MSS279870     | GAGGACUGUCUUAUCCACUCU UUA   | UAAAGAGUGGGAU AAGACAGUCCUC  |
| 154663B09 | Smg1/MSS279871     | CGGAAAGUUGUGGACAGAAUCU UCA  | UGAAGAUUCUGUCCACAACUUUCCG   |
| 154663B11 | Smg1/MSS279872     | CCUCAUAUUUAUUC CUGCAAUAGUA  | UACUAUUGCAGGAUAUAAUAUGAGG   |
| 154663C01 | Nfkb2/MSS207035    | CCAAGGACAUGACUGCUC AAUUUUA  | UUAAAUUGAGCAGUCAUGUCCUUGG   |
| 154663C03 | Nfkb2/MSS207036    | CCCAAUAUUGCACAUGCCUGAUUU    | AAAUCAGGCAUGUGCAAUAUUUGGG   |
| 154663C05 | Nfkb2/MSS207037    | CCAACUCUUA CUCGCCUCCUUCUAA  | UUAGAAGGAGGCGAGUAAGAGUUGG   |
| 154663C07 | Pacsin1/MSS239516  | CCAUGACCCGGGAGAUGAACAGUAA   | UUACUGUUCAUCUCCCGGGUCAUGG   |
| 154663C09 | Pacsin1/MSS239517  | GCAGCUAUGACCGAGGCCAAACAUA   | UAUGUUUGGCCUCGGUCAUAGCUGC   |
| 154663C11 | Pacsin1/MSS239518  | AGGAGCAGGAUGAGCUCAGCUUCA    | UUGAAGCUGAGCUCAUCCUGCUCCU   |
| 154663D01 | Snap25/MSS237950   | GCAAGGCGAACAACUGGAACGCAUU   | AAUGCGUUC CAGUUGUUCGCCUUGC  |
| 154663D03 | Snap25/MSS237952   | GGGCAAUA AUCAGGAUGGAGUAGUG  | CACUACUCCAUC CUGAUUAUUGCCC  |
| 154663D05 | Snap25/MSS277146   | GCCAUCAGUGGUGGC UUCAUCCGCA  | UGCGGAUGAAGCCACCACUGAUGGC   |
| 154663D07 | Snx5/MSS229554     | GGAUAUGAU CAGGAUCUAAGUGUU   | AACACUUAGAUC CUGAUCAUAUUC   |
| 154663D09 | Snx5/MSS229555     | UCAACGGAA GAGAGUGGCAGCAUU   | AAUGCUGCCACUCUCUCCGUUUGA    |
| 154663D11 | Snx5/MSS290594     | CCCAUCGCUUCAGAUCGACAUACCU   | AGGUAUGUCGAUCUGAAGCGAUGGG   |
| 154663E01 | Pacsin2/MSS215933  | GCUGGUAGAGAAGGGACCACAGUAU   | AUACUGUGGUCCCUUCUCUACCAGC   |
| 154663E03 | Pacsin2/MSS215934  | ACAGGGUUGGUGCAAGGGACGUUUA   | UAAACGUCCCUUGCACCAACCCUGU   |
| 154663E05 | Pacsin2/MSS215935  | GAGCAUCA AAGCAGCAGAUGC GGUA | UACCGCAUCUGCUGCUUUGAUGCUC   |
| 154663E07 | Snpb3/MSS277255    | CCCAAUGUCA AUGUGCACAACU UUA | UAAAGUUGUGCACA UUGACA UUGGG |
| 154663E09 | Snpb3/MSS277256    | CCCACUGACU UUGACAGCUUGGAGA  | UCUCCAAGCUGUCA AAGUCAGUGGG  |

|           |                               |                            |                            |
|-----------|-------------------------------|----------------------------|----------------------------|
| 154663E11 | Spnb3/MSS277257               | CAGUCAAGAUUGAUUGACCAUGAA   | UUCAUGGUCAAUCAUAUCUUGACUG  |
| 154663F01 | Pacsin3/MSS294410             | CCAGUAGCGACAAGUUCCAUGAACU  | AGUUCAUGGAAACUUGUCGCUACUGG |
| 154663F03 | Pacsin3/MSS294411             | CCGUAAAAGCUCAGAAGCCCUGGCUA | UAGCCAGGGCUUCUGAGCUUUACGG  |
| 154663F05 | Pacsin3/MSS294412             | GAGGCUGAAGGAGGUUGAGGCUUCU  | AGAAGCCUCAACCUCCUUCAGCCUC  |
| 154663F07 | Pak2/MSS212562                | GCAGUGCUGGAUGUCUUGAAGUUCU  | AGAACUUCAAGACAUCCAGCACUGC  |
| 154663F09 | Pak2/MSS212563                | CCAGUUCGGAUGAGCAGUACCAUUU  | AAUUGGUACUGCUCAUCCGAACUGG  |
| 154663F11 | Pak2/MSS278828                | CAGCCAUCACAGUUUGAAACCUUU   | AAAGGUUUCAAACUGUGAUUUGCUG  |
| 154663G01 | Stmn1/NM_019641.4_stealth_2   | CAGCCAUUGCGGAGCGCCUGGUCUG  | CAGACCAGGCGCUCGCAUUGGCUG   |
| 154663G03 | Stmn1/NM_019641.4_stealth_10  | GCGGAGCGCCUGGUCUGGGUCACGU  | ACGUGACCCAGACCAGGCGCUCGCG  |
| 154663G05 | Stmn1/NM_019641.4_stealth_705 | GACAGAUAGUCUAGAAGCCGAUGUA  | UACAUCGGCUUCUAGACUAUCUGUC  |
| 154663G07 | Stmn2/MSS237848               | GCAGGAACAAGGAACUGCAGGUUGA  | UCAACCUGCAGUUCUUGUUCUGC    |
| 154663G09 | Stmn2/MSS237849               | UCCACGAACUCUAGCUUCUCCAAAG  | CUUUGGAGAAGCUAGAGUUCGUGGA  |
| 154663G11 | Stmn2/MSS237850               | CCUGUCUCUGGAGGAGAUUCAGAAA  | UUUCUGAAUCUCCUCCAGAGACAGG  |
| 154663H01 | Pin1/NM_023371.3_stealth_1262 | CCUCAGCACACAGACAGACUGCUUA  | UAAGCAGUCUGUCUGUGUGCUGAGG  |
| 154663H03 | Pin1/NM_023371.3_stealth_1302 | CACCCAGCAUCUGCCACCCACUUCU  | AGAAGUGGGUGGCAGAUGCUGGGUG  |
| 154663H05 | Pin1/NM_023371.3_stealth_1365 | UCUCCAGGUGCUGUUUCAUGGUAA   | UUACCAUGGAAACAGCACCUGGAGA  |
| 154663H07 | Plcb3/MSS207740               | CGGCGCGGAGUAAGUUCAUCAAU    | AUUUGAUGAACUUCUCCCGCGCCG   |
| 154663H09 | Plcb3/MSS207741               | GGAUACCACUAUGUCUGCCUGCGAA  | UUCGCAGGCAGACAUAGUGGUAUCC  |
| 154663H11 | Plcb3/MSS276375               | CAGGACUAUGCGGAGGCCUUGAUUA  | UAAUCAAGGCCUCCGCAUAGUCCUG  |
| 154664A01 | Stmn3/NM_009133.3_stealth_343 | UCGCUCAUUUGUCUCCUGCUUCUACU | AGUAGAAGCAGGAGCAAUUGAGCGA  |
| 154664A03 | Stmn3/NM_009133.3_stealth_440 | GCCAGAGCUUCGAGGUCAUCCUCA   | UUGAGGAUGACCUCGAAGCUCUGGC  |
| 154664A05 | Stmn3/NM_009133.3_stealth_807 | GCAGCGGGAGGAAAUGUCUGGCUAA  | UUAGCCAGACAUUCCUCCCGCUGC   |
| 154664A07 | Stx4a/MSS238052               | GGGAGAUGAUCAACCGLAUCGAGAA  | UUCUCGAUGCGGUUGAUCUUCUCC   |
| 154664A09 | Stx4a/MSS238053               | GCAGUAUCCGAGAGCUCCAUGAGAU  | AUCUCAUGGAGCUCUCGGAUACUGC  |
| 154664A11 | Stx4a/MSS238054               | GCAGAACCUGCGAGAGGAGAUCAAA  | UUUGAUCUCCUCUCGCAGGUUCUGC  |
| 154664B01 | Prkcd/MSS207669               | CCCUUCCUGCGCAUCUCCUUCAAUU  | AAUUGAAGGAGAUGCAGGAAAGGG   |
| 154664B03 | Prkcd/MSS207670               | GGACACAACAGAGUCUGUCGGAUA   | UAUUCGACAGACUCUGUUGUGUCC   |
| 154664B05 | Prkcd/MSS276343               | CAUGAACCGUCGUGGAGCCAUUAAA  | UUUAAUGGCUCCACGACGGUUCAUG  |
| 154664B07 | Pstpip1/MSS276532             | GCAAUGCCCUGUGGGUGCAGUUA    | UUACAGUGCACCCACAGGGCAUUGC  |
| 154664B09 | Pstpip1/MSS276533             | GAGAGAGACAGAAAGAGCAGCGGAA  | UUCGCGUCUCUUUCUGUCUCUCUC   |
| 154664B11 | Pstpip1/MSS276534             | GAGGCAGAAAGAGUGUACAGGCAA   | UUUGCCUGUACACUCUUUCUGCCUC  |
| 154664C01 | Tjp1/MSS211847                | GCACGCAUCACAGCCUGGUUGUUUA  | UAAACAACCAGGCUGUGAUGCGUGC  |
| 154664C03 | Tjp1/MSS211848                | GCAAAGAGAUGAGCGGGCUACCUUA  | UAAGGUAGCCCGCUAUCUCUUUGC   |
| 154664C05 | Tjp1/MSS211849                | GGGCCUACACUGAUCAGAAGACUAGA | UCUAGUUCUUGAUCAGUGUAGGCC   |
| 154664C07 | Tpm1/MSS247946                | GAGAGAGGCAUGAAAGUCAUUGAAA  | UUUCAUAGACUUUCAUGCCUCUCUC  |
| 154664C09 | Tpm1/MSS247947                | GGCUGAGUUUGCAGAGAGAUCAUGA  | UACUGAUCUCUCUGCAAACUCAGCC  |
| 154664C11 | Tpm1/MSS278512                | UGGAUCAGACUUUACUGGAGCUAAA  | UUUAGCUCAGUAAAGUCUGAUCCA   |
| 154664D01 | Vac14/MSS214907               | GGAUCUGGAAGUGUUGGCAGAAAUU  | AAUUUCUGCCAACACUCCAGAUCC   |
| 154664D03 | Vac14/MSS214908               | CACUCCACCAUGAACUCCUACUUU   | AAAGUAGGAGUUCUUGGUGGAGUG   |
| 154664D05 | Vac14/MSS214909               | UCUUCAGCUGAGGAACCAGCUCAA   | UUGAGCUGGUUCCUCAGCUGGAAGA  |
| 154664D07 | NM_146100.4_stealth_89        | CCGCCUCCUCCUACCGCAAGGUGUU  | AACACCUUGCGGUAGGAGGAGGCGG  |
| 154664D09 | NM_146100.4_stealth_1646      | CCGCUAUAGAAUGUCUGCAAGGCUU  | AAGCCUUGCAGACAUUCUAUAGCGG  |

|           |                          |                            |                            |
|-----------|--------------------------|----------------------------|----------------------------|
| 154664D11 | NM_146100.4_stealth_2138 | CGUAUGCCCUUUAGCUAGCUCUUCU  | AGAAGAGCUAGCUAAAGGGCAUACG  |
| 154664E01 | Wasf3/MSS217310          | UCCCAACCCUGUUGCUGACAUUUUAU | AUAAAUGUCAGCAACAGGGUUGGGA  |
| 154664E03 | Wasf3/MSS217311          | GGCCACCAUCUUGUCUAGACGCAUU  | AAUGCGUCUAGACAAGAUGGUGGCC  |
| 154664E05 | Wasf3/MSS217312          | GCCAGGAGUGGAAUAUGAUGGCGUA  | UACGCCAUCAUUUCCACUCCUGGC   |
| 154664E07 | Zyx/MSS238955            | CCCACCAGUUGCCACUCCAUUUGUU  | AACAAAUGGAGUGGCAACUGGUGGG  |
| 154664E09 | Zyx/MSS238956            | GGCUCCUAAAUUUACUCCCGUGGUU  | AACCACGGGAGUAAAUUUAGGAGCC  |
| 154664E11 | Zyx/MSS238957            | CAGAUGACAACGGCUGUUUCCUCU   | AGAGGGAAACAGCCGUUGUCAUCUG  |
| 154664F01 | Kif5c/MSS275222          | CCGGGACAGCAAGAUGACUCGGAUU  | AAUCCGAGUCAUCUUGCUGUCCCGG  |
| 154664F03 | Kif5c/MSS275223          | CAAGGCCUUGGAGAGUGCGCUGAAA  | UUUCAGCGCACUCUCCAAGGCCUUG  |
| 154664F05 | Kif5c/MSS275224          | GGAAGUUACAUGAUCCUCAGCUUUAU | AUAAGCUGAGGAUCAUGUAACUUC   |
| 154664F07 | Klc1/MSS205817           | GAGCACAACUCCAUCUGCAGAGUU   | AACUCUGCAGGAUGGAGUUGUGCUC  |
| 154664F09 | Klc1/MSS205818           | UCACGCAGGAUGAGAUAUCUCUAA   | UUAGAGAUGAUCUCAUCCUGCGUGA  |
| 154664F11 | Klc1/MSS205819           | GCCGUUGGAUGAUCUCUUCCCAAU   | AUUUGGGAAGAGAUAUCCAACGGC   |
| 154664G01 | Actn3/MSS201671          | CCAAUGUCAAUAAAGCCCUAGACUU  | AAGUCUAGGGCUUUUUGACAUUGG   |
| 154664G03 | Actn3/MSS201672          | CCUCUAUGGAGAGAGUGACCUCUGA  | UCAGAGGUCACUCUCUCCAUAAGAGG |
| 154664G05 | Actn3/MSS201673          | GCUCUGGACUACGUGGCUUUCUCUA  | UAGAGAAAGCCACGUAGUCCAGAGC  |
| 154664G07 | Add1/MSS201758           | GGGAGCAGGAAUUUGAAGCUCUUAU  | AUAAGAGCUUCAAUUCCUGCUC     |
| 154664G09 | Add1/MSS201759           | GAAGAAGAGGGUGUCUAUGAUUCUA  | UAGAAUCAUAGACACCCUCUUCUUC  |
| 154664G11 | Add1/MSS201760           | GCCAAGUGUAUUGUGCACAUCCACA  | UGUGGAUGUGCACAAUACACUUGGC  |
| 154664H01 | Klc2/MSS236981           | CGACCCUCAACAUCUGGCUGUUCU   | AGAACAGCCAGAUUGUUGAGGGUCG  |
| 154664H03 | Klc2/MSS236982           | GAGGAGGUGGAAUACUACUACCGGA  | UCCGGUAGUAGUAUUCACCUCUC    |
| 154664H05 | Klc2/MSS236983           | GAGACCCUGUACAAGGAGAUCCUUA  | UAAGGAUCUCCUUGUACAGGGUCUC  |
| 154664H07 | NM_008634.2_stealth_203  | CACCGCUUCCUAGACAGCAAGUUCU  | AGAACUUGCUGUCUAGGAAGCGGUG  |
| 154664H09 | NM_008634.2_stealth_7616 | CAGUUUUUACCUGCCAGAUGCUAUA  | UAUAGCAUCUGGCAGGUAAUACUG   |
| 154664H11 | NM_008634.2_stealth_8228 | CACACGGCAUAAUGUAGCAAGUGUA  | UACACUUGCUCACUUAUGCCGUGUG  |
| 154665A01 | Arrb1/MSS201215          | GGAAAGCUCACUGUCUACCUUGGGAA | UUCCCAGGUAGACAGUGAGCUUUC   |
| 154665A03 | Arrb1/MSS201216          | CCUUCACCUUUGAGAUCCCGCCAAA  | UUUGGCGGGAUCUCAAGGUGAAGG   |
| 154665A05 | Arrb1/MSS272777          | GACACCAUGAUGACGACAUUGUAU   | AUACAAUGUCGUCAUCAUUGGUGUC  |
| 154665A07 | Cdk5/MSS247085           | GGAGGGACCUGUUGCAGAACCUAUU  | AAUAGGUUCUGCAACAGGUCCCUC   |
| 154665A09 | Cdk5/MSS247086           | GGGAGAUCUGUCUACUCAAGAACU   | AGUUCUUGAGUAGACAGAUUC      |
| 154665A11 | Cdk5/MSS247087           | CCAUGACCAAGCUGCCAGACUAUAA  | UUUAUGUCUGGCAGCUUGGUCAUGG  |
| 154665B01 | Map2k3/MSS240938         | GGAUCAACCCUGAACUGAAUCAGAA  | UUCUGAUUCAGUUCAGGGUUGAUCC  |
| 154665B03 | Map2k3/MSS240939         | ACCUUCAUCACUAUCGGAGACAGAA  | UUCUGUCUCCGAUAGUGAUGAAGGU  |
| 154665B05 | Map2k3/MSS281881         | UGGAGCUGAUGGAACCCAUUCU     | AAGAAUGGGUGUCCAUCAGCUCCA   |
| 154665B07 | Mapre1/MSS274053         | CCGAAGAAACCUCUCGGCUCCAGUA  | UACUGGAGCCGAGAGGUUUCUUCGG  |
| 154665B09 | Mapre1/MSS274054         | CAUUGCAACACAGAGGACUACUGCA  | UGCAGUAGUCCUCUGUGUUGCAAUG  |
| 154665B11 | Mapre1/MSS274055         | CAGCAGGUCAAAGUACUGAAGCUUA  | UAAGCUUCAGUACUUUGACCUGCUG  |
| 154665C01 | Cttn/MSS247133           | GGAGAAGCAUGAGUCUCAGAAAGAU  | AUCUUUCUGAGACUCAUGCUUC     |
| 154665C03 | Cttn/MSS247134           | GGUGGAUCAGUCUGCUGUAGGCUUU  | AAAGCCUACAGCAGACUGAUCCACC  |
| 154665C05 | Cttn/MSS247135           | GGCCAUGAGUACCAGUCGAAGCUUU  | AAAGCUUCGACUGGUACUCAUGGCC  |
| 154665C07 | Mapt/MSS275836           | CAGUCGAAGAUUGGCUCCUUGGAUA  | UAUCCAAGGAGCCAAUCUUCGACUG  |
| 154665C09 | Mapt/MSS275837           | CAGGAGGUGGCAAGGUGCAGAUAAU  | AUUUUCUGCACCUUGCCACCUCUG   |

|           |                          |                            |                            |
|-----------|--------------------------|----------------------------|----------------------------|
| 154665C11 | Mapt/MSS275838           | CAGGAGGUGGCCAGGUGGAAGUAAA  | UUUACUCCACCUGGCCACCUCCUG   |
| 154665D01 | Dpysl3/MSS238620         | AGGGAUUGACCACAGUGGACGAUUU  | AAUUCGUCCACUGUGGUCAUUCCCU  |
| 154665D03 | Dpysl3/MSS278607         | CAGCUCUCUGGAAGUGCCCACUGUA  | UACAGUGGGCACUUCAGAGAGCUG   |
| 154665D05 | Dpysl3/MSS278608         | CCUCUGGUGGUUAUCUGCCAGGGCA  | UGCCCUGGCAGAUAAACCACCAGAGG |
| 154665D07 | Dpysl4/MSS218676         | GCCAGUGUACUGACGGUCAGAUUA   | UAUAUCUGACCGUCAGUACACUGGC  |
| 154665D09 | Dpysl4/MSS218677         | CGUGCAUCCUGUUCAGGCAAGAUCU  | AGAUCUUGCCUGAACAGGAUGCACG  |
| 154665D11 | Dpysl4/MSS281959         | CCAAGAGCCAUAACCGUAAUGUAGA  | UCUACAUUCAGGUUAUGGCUCUUGG  |
| 154665E01 | Nck1/MSS206957           | GAGAGAGGAUGAGUUGUCAUUGAUA  | UAUCAUUGACAACUCAUCCUCUCUC  |
| 154665E03 | Nck1/MSS206958           | UCGUGACAGUGAAUCUUCGCCAAAU  | AUUUGGCGAAGAUUCACUGUCACGA  |
| 154665E05 | Nck1/MSS275938           | UGGCGAGUUCGAAAUCCAUGAAUA   | UAUUAUGGAAUUUCGAACUCGCCA   |
| 154665E07 | NM_010904.3_stealth_17   | CGGACCGGGCCACCGCGGAUAUAAA  | UUUAUAUCCGCGGUGGCCCGGUCCG  |
| 154665E09 | NM_010904.3_stealth_1032 | CAGCCAAAGUGAACACAGAUUCUAU  | AUAGCAUCUGUGUUCACUUUGGCUG  |
| 154665E11 | NM_010904.3_stealth_3945 | CCACUUUCAAUUGCUUCAUGCAAU   | AUUGCAUGGAAGCAAUUGAAAGUGG  |
| 154665F01 | Dpysl5/MSS227180         | GAAUCGAGAUCAGCCAUCAGAGGA   | UCCUCUGGAUGGCUGAUCUCGAUUC  |
| 154665F03 | Dpysl5/MSS227181         | GGCAAGGUGGUGAACGAUGACUGUA  | UACAGUCAUCGUUCACCACCUUGCC  |
| 154665F05 | Dpysl5/MSS227182         | AGGCAGGUCGAGCGGUUUUGGUAA   | UUACCAAUACCGCUCGACCUGCCU   |
| 154665F07 | 1110012M11Rik/MSS246023  | ACGUGAAGCUGAGUGGGAAGACUAA  | UUAGUCUUCACUCAGCUUCACGU    |
| 154665F09 | 1110012M11Rik/MSS246025  | UGGACAUGCAGAUUCGUGAUGGACAA | UUGUCCAUCACGAUCUGCAUGUCCA  |
| 154665F11 | 1110012M11Rik/MSS292510  | CAGACAUUGAGAAGGAGUAUAACUA  | UAGUUAUACUCCUUCUCAUGUCUG   |
| 154665G01 | Numb/MSS207221           | ACUGGAAAGUGUAGCUUCCAGUUA   | UAACUGGGAAGCUACACUUUCCAGU  |
| 154665G03 | Numb/MSS207222           | GGCGAUGGAUCUGUCAUUGUUUCAU  | AUGAAACAAUGACAGAUCCAUCGCC  |
| 154665G05 | Numb/MSS207223           | GGCCACGUAGAAGUUGAUGAGUCAA  | UUGACUCAUCAACUUCUACGUGGCC  |
| 154665G07 | Pfn2/MSS207567           | GACUGCACAAUGGACAUCGGACAA   | UUGUCCGGAUGUCCAUGUGCAGUC   |
| 154665G09 | Pfn2/MSS207568           | UCCAGAGCAUCACGCCAGUAGAAAU  | AUUUCUACUGGCGUGAUGCUCUGGA  |
| 154665G11 | Pfn2/MSS276301           | CCGGGAGAGUCUUGGUCUUUGUAAU  | AUUACAAAGACCAAGACUCUCCGG   |
| 154665H01 | Hgs/MSS205115            | UGGAGGUGCAGAGACAGCUAGCUAU  | AUAGCUAGCUGUCUCUGCACCUCCA  |
| 154665H03 | Hgs/MSS205116            | GGAGUCAGACUGGGAGUCCAUUCUA  | UAGAAUGGACUCCAGUCUGACUCC   |
| 154665H05 | Hgs/MSS205117            | CCUGCUAUGAGCAGCUGAACAAGAA  | UUCUUGUUCAGCUGCUCAUAGCAGG  |
| 154665H07 | Htt/MSS205084            | GGUUCGACAUGUUGCUGCAACAUCA  | UGAUGUUGCAGCAACAUGUCGAACC  |
| 154665H09 | Htt/MSS274794            | GAUGGCUGUGAAGGCAGCUUCUAUA  | UAUAGAAGCUGCCUUCACAGCCAUC  |
| 154665H11 | Htt/MSS274795            | CAUCAAAGCUUUGAUGGAUUCUAAU  | AUUAGAAUCCAUCAAGCUUUGAUG   |
| 154666A01 | Ppp1r8/MSS200043         | GGAACCUCACAAGCCUCAACAGAUU  | AAUCUGUUGAGGCUUGUGAGGUUCC  |
| 154666A03 | Ppp1r8/MSS200044         | UCAGACAUUGCCAUCGGCUGUGAAA  | UUUCACAGCCGAUGGCAAUGUCUGA  |
| 154666A05 | Ppp1r8/MSS272038         | CGAGGGCAUACACUCUGCGAGAGAA  | UUCUCUCGCAGAGUGUAUGCCCUCG  |
| 154666A07 | Prkce/MSS207671          | GGACGUUAUCCUACAAGACGAUGAU  | AUCAUCGUCUUGUAGGAUAACGUCC  |
| 154666A09 | Prkce/MSS207672          | GCGGGAAGAGCCAAUACUACACUU   | AAGUGUAAGUAUUGGCUCUUCGGC   |
| 154666A11 | Prkce/MSS207673          | GGACGACUUGUUCGAAUCCAUCUU   | AAGGAUGGAUUCGAACAAGUCGUCC  |
| 154666B01 | Raf1/MSS235712           | GGAGAUGUUGCAGUAAAGAUCUAA   | UUAGGAUCUUUACUGCAACAUCUCC  |
| 154666B03 | Raf1/MSS235713           | CCCACAUACAACCGAGACCAGAU    | AUCUGGUCUCGGUUGUUGAUGUGGG  |
| 154666B05 | Raf1/MSS235714           | GGUGUGAAGGCAGCAGUCUCUACAA  | UUGUAGAGACUGCUGCCUUCACACC  |
| 154666B07 | Pitpnm1/MSS207644        | GGGAAACAAGCGGAUCGACUAUUCA  | UGAAUAGUCGAUCCGCUUGUUUCCC  |
| 154666B09 | Pitpnm1/MSS207645        | UCAUCCUCCGUUCCUCCUACUCAU   | AUGAGUAGGAGGAACGGGAGGAUGA  |



|           |                         |                            |                            |
|-----------|-------------------------|----------------------------|----------------------------|
| 154666B11 | Pitpnm1/MSS207646       | GGAUAGAACUGAGCAUGGCUGACAU  | AUGUCAGCCAUGCUCAGUUCUAUCC  |
| 154666C01 | Rtn4/MSS229196          | GGAGUGGUGUUUGGUGCCAGCUUUAU | AUAAGCUGGCACCAAACACCACUCC  |
| 154666C03 | Rtn4/MSS229197          | GGCGUCUCUUCUUAAGUUGAUGAUUU | AAAUCAUCAACUAAGAAGAGACGCC  |
| 154666C05 | Rtn4/MSS229198          | GGGUGUGAUCCAAGCUAUCCAGAAA  | UUUCUGGAUAGCUUGGAUCACACCC  |
| 154666C07 | Sept9/MSS244103         | CCAGCAACAUCCACUUCGAAGCCUA  | UAGGCUUCGAAGUGGAUGUUGCUGG  |
| 154666C09 | Sept9/MSS244104         | CCCAAGACGAUCGAAAUCAAGUCGA  | UCGACUUGAUUUUGAUCGUCUUGGG  |
| 154666C11 | Sept9/MSS244105         | UGCUGUCCAACGGCAUUGACGUGUA  | UACACGUCAAUGCCGUUGGACAGCA  |
| 154666D01 | Plcg1/MSS207749         | GAGCUCAGGCUGAACAUUAGCUGAU  | AUCAGCAUUAUGUUCAGCCUGAGCUC |
| 154666D03 | Plcg1/MSS207750         | CCUACCUCUGUGAUGUACUCCGAGA  | UCUCGGAGUACAUCACAGAGGUAGG  |
| 154666D05 | Plcg1/MSS207751         | GGAUCGUAACCGAGAGGAUCGUUA   | UAUACGAUCCUCUCGGUUACGAUCC  |
| 154666D07 | Plxna1/MSS207786        | GGAUUGGCAACUUUGUCAUUGACAA  | UUGUCAUUGACAAAGUUGCCAUUCC  |
| 154666D09 | Plxna1/MSS207787        | UGGAGGUACCUGGAUUGGCAUCGAA  | UUCGAUGCCAAUCCAGGUACCUCCA  |
| 154666D11 | Plxna1/MSS276393        | GACAGGGAAGAAGUUUGCAUCUGUG  | CACAGAUGCAAACUUCUUCUCCUGUC |
| 154666E01 | Smpd3/MSS226812         | CCUCAGAUCAGAUCUACAUCGAUU   | AAUCGAUGUAGAUCUUGAUCUGAGG  |
| 154666E03 | Smpd3/MSS226813         | CCUUUUGCCUUUCUCGGGUUCAUCU  | AGAUGAACCCGAGAAAGGCAAAGGG  |
| 155212E02 | Smpd3/MSS286183         | GGACCGGCUGUUGGCCUCUUUCAUA  | UAUGAAAGAGGCCAACAGCCGGUCC  |
| 154666E07 | Tsg101/MSS238580        | CCAGGCAGAGCUUAAUGCCUUGAAA  | UUUCAAGGCAUUAAGCUCUGCCUGG  |
| 154666E09 | Tsg101/MSS238581        | GAUUCUAAAUCUGUAUGCAGAGGAA  | UUCUCUGCAUACAGAUUUAGAAUC   |
| 154666E11 | Tsg101/MSS278552        | CCCAGUGCGUUAUCGAGGUAAUAUA  | UAUAUUACCUCGAUAACGCACUGGG  |
| 154666F01 | Plxnb1/MSS215124        | GGGUCUCCUGUGAACAGAGAUCUUA  | UAAGAUCUCUGUUCACAGGAGACCC  |
| 155212E04 | Plxnb1/MSS215125        | GGGACUUAAGAAAGUGCAGAUCCA   | UGGAUCUGCACUUUCUUAUAGUCCC  |
| 154666F05 | Plxnb1/MSS280068        | CCGACUCUUGCACCUUGGAUGUUGA  | UCAACAUCAAGGUGCAAGAGUCGG   |
| 154666F07 | Prkca/MSS207659         | UCCAAAUGGGCUUUCGGAUCCUUAU  | AUAAGGAUCCGAAAGCCCAUUUGGA  |
| 154666F09 | Prkca/MSS207660         | GGGAUGAAAUGUGACACCUGCGACA  | UGUCGCAGGUGUCACAUUUCAUCCC  |
| 154666F11 | Prkca/MSS207661         | GGGAUGUCAGAGAGCAUGCCUUCU   | AAGAAGGCAUGCUCUCUGACAUCCC  |
| 154666G01 | NM_011653.2_stealth_723 | UAACCUAAACAGGUUGAUAGGUCAA  | UUGACCUAUCAACCUUUUAGGUUA   |
| 154666G03 | NM_011653.2_stealth_725 | ACCUAAACAGGUUGAUAGGUCAAU   | AUUUGACCUAUCAACCUUUUAGGU   |
| 154666G05 | NM_011653.2_stealth_726 | CCUAAACAGGUUGAUAGGUCAAUU   | AAUUUGACCUAUCAACCUUUUAGG   |
| 154666G07 | Vim/MSS238655           | GCCAUCAACACUGAGUUCAAGAACA  | UGUUCUUGAACUCAGUGUUGAUGGC  |
| 154666G09 | Vim/MSS238656           | GGUGAUCAAUGAGACUUCUCAGCAU  | AUGCUGAGAAGUCUCAUUGAUCACC  |
| 154666G11 | Vim/MSS278712           | CACCUUGUGAAGUGGAUGCCUUAUA  | UUUAAGGGCAUCCACUUCACAGGUG  |
| 154666H01 | Sh3glb2/MSS279238       | CGGAGCAGCAGAGCGGGAUUUCAU   | AAUGAAAUCCCGCUCUGCUCGCCG   |
| 154666H03 | Sh3glb2/MSS279239       | CCAAAGCCACGACGGUGCCUGACU   | AAGUCAGGCACCGUCGUGGCCUUUG  |
| 154666H05 | Sh3glb2/MSS279240       | ACUAGACCUCGUAAUACAUCUUAU   | AUAGAAUGUAAUACGAGGUCUAGU   |
| 154666H07 | Slk/MSS209687           | GGCUGUGGAUGAGCAUGCAAGUGAU  | AUCACUUGCAUGCUCAUCCACAGCC  |
| 154666H09 | Slk/MSS209688           | CCCUGUCUUAUACCCAGUAUUUAU   | AUUAAUACUGGGUUAUUAAGACAGGG |
| 154666H11 | Slk/MSS209689           | UGUCCUUCUUAUUAUUCGUAAGAU   | AUCUUACGAAAUUGAAGAAGGACA   |
| 154667A01 | Yes1/MSS212966          | CCGAGAUCUCCGAGCUGCUAAUAU   | AAUAUUAGCAGCUCGGAGAUCUCGG  |
| 154667A03 | Yes1/MSS212968          | CCUUUAAGAAGGGUGAACGAUUUCA  | UGAAAUCGUUCACCCUUCUUAAGG   |
| 154667A05 | Yes1/MSS279041          | CAGGUUAUGGUAACCGUGAAGUAU   | AAUACUUCACGGUUUACCAUACCUG  |
| 154667A07 | Src/MSS238007           | GCCCGGCUCAUAGAAGACAACGAU   | AUUCGUUGUCUUCUAUGAGCCGGGC  |
| 154667A09 | Src/MSS238008           | UGGCCUAUGUGGAGCGGAUGAACUA  | UAGUUCAUCCGCUCCACAUAGGCCA  |

|           |                        |                            |                            |
|-----------|------------------------|----------------------------|----------------------------|
| 154667A11 | Src/MSS238009          | UCACUACCGUAUGUCCACAUCCAA   | UUGGAUGUGGGACAUCGGUAGUGA   |
| 154667B01 | Akap1/MSS201872        | CAGGUCAAAGGUAGCAGCAUACUU   | AAGUAUUGCUGCUACCUUUGACCUG  |
| 154667B03 | Akap1/MSS201873        | CCAACCCUAAGAAGGUUGACCUUUAU | AUAAGGUCAACCUUCUUAGGGUUGG  |
| 154667B05 | Akap1/MSS201874        | GCAGUGCUCAGAUCUGUCAGUACU   | AGUACUGACAGGAUCUGAGCACUGC  |
| 154667B07 | Aplp2/MSS202122        | GGACAGGGUAAAAGAAGGAAUGGGAA | UUCCCAUUCUUCUUUACCCUGUCC   |
| 154667B09 | Aplp2/MSS202123        | GGGAGGAUUUCAGUUUGAGCAGCAA  | UUGCUGCUCAAACUGAAAUCCUCCC  |
| 154667B11 | Aplp2/MSS273224        | CAAGUGUCUUGUGGGUGAAUUUGUA  | UACAAAUUCACCCACAAGACACUUG  |
| 154667C01 | Stx1a/MSS277458        | GCGAACAAAGUUCGCUCCAAGCUAA  | UUAGCUUGGAGCGAACUUUGUUCGC  |
| 154667C03 | Stx1a/MSS277459        | GGACCACGACCAGUGAGGAAUUGGA  | UCCAAUCCUCACUGGUCGUGGUCC   |
| 154667C05 | Stx1a/MSS277460        | GGGAGAUGAUUGACAGGAUCGAGUA  | UACUCGAUCCUGUCAAUCAUCUCCC  |
| 154667C07 | Unc119/MSS247961       | CCGCAUGAUCGAGAGGCACUACUUU  | AAAGUAGUGCCUCUCGAUCAUGCGG  |
| 154667C09 | Unc119/MSS247962       | UCAGUGAGAUGAUUCGUCACCCGUA  | UACGGGUGACGAAUCAUCUCACUGA  |
| 154667C11 | Unc119/MSS247963       | UCUACAAGAUUGACUUCGUCAGGUU  | AACCUGACGAAGUCAAUUCUUGUAGA |
| 154667D01 | Ctnnd1/MSS202667       | GGGCACCCAGUAGACAAGAUGUCUA  | UAGACAUCUUGUCUACUGGGUGCCC  |
| 154667D03 | Ctnnd1/MSS202668       | GAAGCAGUGUGGACCUGCAUCGUUU  | AAACGAUGCAGGUCCACACUGCUUC  |
| 154667D05 | Ctnnd1/MSS202669       | CCCAGGAUCACAACCACCUUCUGUA  | UACAGAAGGUGGUUGUGAUCCUGGG  |
| 154667D07 | Lgals1/MSS275330       | GCAACAACCUUGGCCUACACUUCAA  | UUGAAGUGUJAGGCACAGGUUGUUGC |
| 154667D09 | Lgals1/MSS275331       | AGCUGCCAGACGGACAUGAAUUCAA  | UUGAAUUCAUUGCCGUCUGGCAGCU  |
| 154667D11 | Lgals1/MSS275332       | UGGUCGCCAGCAACCUGAAUCUCAA  | UUGAGAUUCAGGUUGCUGGCGACCA  |
| 154667E01 | Vamp2/MSS278658        | CCUCCAAACCUUACUAGUAACAGGA  | UCCUGUACUAGUAAGGUUUGGAGG   |
| 154667E03 | Vamp2/MSS278659        | GGACCAGAAGUUGUCGGAGCUGGAU  | AUCCAGCUCCGACAACUUCUGGUCC  |
| 154667E05 | Vamp2/MSS278660        | UCAUCCUCAUCAUCAUCGUUUUA    | UAAACGAUGAUGAUGAUGAGGAUGA  |
| 154667E07 | Myo9b/MSS237347        | CCUCCUUCUGAAGAGUAAAGGUUAU  | AUACCUUUACUCUUCAGGAAGGAGG  |
| 154667E09 | Myo9b/MSS237348        | UGACUGAAGCCAACCUUGCUCAGAA  | UUCUGCAGCAGGUUGGCUUCAGUCA  |
| 154667E11 | Myo9b/MSS237349        | ACAGGCAGAACUACCAGAUUUGGAAA | UUUCCAAUCUGGUAGUUCUGCCUGU  |
| 154667F01 | Pik3r1/MSS207624       | CCAGCAGGAUCAAGUUGUCAAAAGAA | UUCUUUGACAACUUGAUCCUGCUGG  |
| 154667F03 | Pik3r1/MSS276325       | CCCACUACUGUAGCCAACAACAGCA  | UGCUGUUGUUGGCUACAGUAGUGGG  |
| 154667F05 | Pik3r1/MSS276326       | GAGACAUCUCAAGGGAAGAAGUGAA  | UUCACUUCUUCUUUGAGAUGUCUC   |
| 154667F07 | Actin_(Mouse)          | ACGUUGACAUCCGUAAAGACCUCUA  | UAGAGGUCUUUACGGAUGUCAACGU  |
| 154667F09 | Srgap1/MSS202046       | GAUCAUAGCCGAGUAUGAAAGUCAA  | UUGACUUUCAUACUCGGCUAUGAUC  |
| 154667F11 | Srgap1/MSS202047       | GACUGACCGCCAUUCUGAUAGCUAU  | AUAGCUAUCAGAAUGGCGGUCAGUC  |
| 154667G01 | Srgap1/MSS202048       | ACCAACGCCUCCGUGUUCAAGUAUU  | AAUACUUGAACACGGAGGCGUUGGU  |
| 154667G03 | Actin_(Mouse).1        | ACGUUGACAUCCGUAAAGACCUCUA  | UAGAGGUCUUUACGGAUGUCAACGU  |
| 154667G05 | NM_007664_stealth_2727 | CCAACAUUCCAUCUCCUGCGUGUGAA | UUCACACGCAGGAUGGAAAUGUUGG  |
| 154667G07 | NM_007664_stealth_2097 | CAGCCACUGUGUCUGUGACAGUUUAU | AUAACUGUCACAGACACAGUGGCUG  |
| 154667G09 | NM_007664_stealth_1029 | CAACCCUGACUGAGGAGCCUAUGAA  | UUCAUAGGCUCCUCAGUCAGGGUUG  |
| 154667G11 | Srgap2/MSS204395       | ACAUGAAGGUCUGGAUGCUAUUGAA  | UUCAAUAGCAUCCAGACCUUCAUGU  |
| 154667H01 | Srgap2/MSS204396       | UCACAAGUAGAAGUGAACGACAUAU  | UUUUGUCGUUCACUUCUACUUGUGA  |
| 154667H03 | Srgap2/MSS274401       | GAAGCACCAAGGACCAGCAAUUUUA  | UUAAAUUGCUGGUCCUUGGUGCUUC  |
| 154667H05 | Srgap3/MSS281821       | CCGUGAACUGUUGGUAUCUGGUACU  | AGUACCAGAUACCAACAGUUCACGG  |
| 154667H07 | Srgap3/MSS281822       | CACGAUGUCUCUGAUCUCAUCGAUU  | AAUCGAUGAGAUCAGAGACAUCGUG  |
| 154667H09 | Srgap3/MSS281823       | GAGAGCCAACCAGCAGGAAACAGAA  | UUCUGUUCCUGCUGGUUGGCUCUC   |

|           |                            |                            |                            |
|-----------|----------------------------|----------------------------|----------------------------|
| 154667H11 | Clasp1/MSS293730           | CGGCACAGUGUUGCCAAGUCUAAUA  | UAUUAGACUUGGCAACACUGUGCCG  |
| 154668D02 | Clasp1/MSS293731           | CACUAAGCAAGAUUGGCCACAUAU   | AUAUGUGGCACAAUCUUGCUUAGUG  |
| 154668D04 | Clasp1/MSS293732           | CAGAACUUACUGAAGAGCCAAAGAA  | UUCUUUGGCUCUUCAGUAAGUUCUG  |
| 154668D06 | Clasp2/MSS233612           | CCCAAACGCCAAGCUUGAAGGUAAA  | UUUACCUUCAAGCUUGGCGUUUGGG  |
| 154668D08 | Clasp2/MSS233613           | UCUCAGUCAACUCACUGGUAGUAAA  | UUUACUACCAGUGAGUUGACUGAGA  |
| 154668D10 | Clasp2/MSS233614           | GGGUCUAAUACAGGGUUAUGAUAAU  | AUUUAUCAUACCCUGUAUUAGACCC  |
| 154668D12 | Robo1/MSS208673            | CAGCCAUGGUGAAUCGGAGUGGUUA  | UAACCACUCCGAUUCACCAUGGCUG  |
| 154668E02 | Robo1/MSS208674            | GGUGGACCAACAAUCUCAAUUAUU   | AAUAUAUUGAGAUUGUUGGUCCACC  |
| 154668E04 | Robo1/MSS208675            | CAACGCAUCGCUGGAGGUAGCUAUA  | UAUAGCUACCUCAGCGAUGCGUUG   |
| 154668E06 | Robo2/MSS241004            | CCACAUUUCUCAGGAGGCCAAUUA   | UUAAUUGGCCUCCUGAGAAAUGUGG  |
| 154668E08 | Robo2/MSS241005            | CCCUGCAGAGCUCACUGUCUUUGAA  | UUCAAAGACAGUGAGCUCUGCAGGG  |
| 154668E10 | Robo2/MSS282032            | AGGCCAACACAAUCUACUUGUUUA   | UAAACAAGUAGAUUGUGUUGGGCCU  |
| 154668E12 | Wasf1/MSS234749            | CCCUUACAGGGGAUGAUGGUAAGGAA | UUCCUUACCAUCAUCCUGUAAGGG   |
| 154668F02 | Wasf1/MSS234750            | ACCCUGCCUGUAAUCAGUGACGCAA  | UUGCGUCACUGAUUACAGGCAGGGU  |
| 154668F04 | Wasf1/MSS234751            | CCCUGGCAAAUAUAAUUGAGACAACU | AGUUGUCUAAUUAUAAUUGCCAGGG  |
| 154668F06 | Wasf2/MSS216650            | CCUAGCGAUACAAGCGAGCUGGAAU  | AUUCAGCUCGCUUGUAUCGCUAGG   |
| 154668F08 | Wasf2/MSS216651            | CCUCUUAACAAUCUCAGUCCUACA   | UGUAAGGACUGAGAUUGUUAAGAGG  |
| 154668F10 | Wasf2/MSS216652            | GCAGGACACCAAGGAUUAUCAUGAAA | UUUCAUGAUUCCUUGGUGUCCUGC   |
| 154668F12 | Robo3/MSS276804            | CCACAUUGAAUAGCUGGCUUAGGAA  | UUCCUAAGCCAGCUAUUCCAUGUGG  |
| 154668G02 | Robo3/MSS276805            | CCUGAUCCAGAUGAUAGAUACUACA  | UGUAGUAUCUAUCAUCUGGAUCAGG  |
| 154668G04 | Robo3/MSS276806            | CAAGCCUGUACAAAUGCCAUCUUUG  | CAAAGAUGGCAUUUGUACAGGCUUG  |
| 154668G06 | Robo4/MSS232364            | CCAGCCAAGAUGAGGUGCAGAUCAU  | AUGAUCUGCACCUCAUCUUGGCUGG  |
| 154668G08 | Robo4/MSS232365            | GCCAUAAUGGUGUCAUCCGUGGUUA  | UAACCACGGAUGACACCAUUAUGGC  |
| 154668G10 | Robo4/MSS232366            | GGUCUCAUGGUGGAAAGACGGGAAA  | UUUCCCGUCUUUCCACCAUGAGACC  |
| 154668G12 | Wasf3/MSS217310            | UCCCAACCCUGUUGCUGACAUUUUAU | AUAAAUGUCAGCAACAGGGUUGGGA  |
| 154668H02 | Wasf3/MSS217311            | GGCCACCAUCUUGUCUAGACGCAUU  | AAUGCGUCUAGACAAGAUGGUGGCC  |
| 154668H04 | Wasf3/MSS217312            | GCCAGGAGUGGAAUUGAUGGCGUA   | UACGCCAUCAUUUCACUCCUGGC    |
| 154668H06 | NM_001167745.1_stealth_448 | CAAGAAUUGUGUGACUAUGUCUUA   | UGAAGACAUAGUCACACAUUUCUUG  |
| 154668H08 | NM_001167745.1_stealth_622 | GCUAUACAUAACUUGUAUUAUAAU   | AUUUAUAACAAGUUAUUGUAUAGC   |
| 154668H10 | NM_001167745.1_stealth_678 | GAGAUACUUGUCAAGUJAGCUCUUA  | UUAAAGAGCUACUUGACAAGUAUCUC |
| 154668H12 | Actin_(Mouse).2            | ACGUUGACAUCGGUAAAGACCUCUA  | UAGAGGUCUUUACGGAUGUCAACGU  |
| 154669A02 | Slit1/MSS209183            | CCAGGUGUGAGUGCAUGCUAGGUUA  | UAACCUAGCAUGCACUCACACCUGG  |
| 154669A04 | Slit1/MSS209184            | CCAGGGCCAUGUCCGUGUUAGUUUAU | AUAACUAACACGGACAUGGCCUUGG  |
| 154669A06 | Slit1/MSS209185            | CCGCCUGGAGUUGAACGGUAUCAA   | UUUGAUACCGUUCACUCCAGGCGG   |
| 154669A08 | NM_009515_stealth_206      | UGGCUACCACAGUUGUUCAGCUCUA  | UAGAGCUGAACACUGUGGUAGCCA   |
| 154669A10 | NM_009515_stealth_734      | CAACUGAUAAAGAAACGCUCAGGGAA | UUCUUUGAGCGUUUCUUAUCAGUUG  |
| 154669A12 | NM_009515_stealth_1540     | CAGAAGAGGAGUAGAGUCAUCCAUAU | AAUGGAUGACUCUACUCCUCUUCUG  |
| 154669B02 | Slit2/MSS209186            | CAUCACACUUCAGAUUGCCACAGAU  | AUCUGUGGCAUUCUGAAGUGUGAUG  |
| 154669B04 | Slit2/MSS209187            | CCGACUGGGUGAAGUCGAAUAUAA   | UUUAUUAUCCGACUUCACCCAGUCGG |
| 154669B06 | Slit2/MSS209188            | CGCGUCUGGUGUGAAUGAAUUCUUA  | AAGAAUUAUUAUCACACCAGACGCG  |
| 154669B08 | Slit3/MSS209189            | ACUGUGACUGCAGUCUGCGUUGGUU  | AACCAACGCAGACUGCAGUCACAGU  |
| 154669B10 | Slit3/MSS209190            | UGGUGAUGCUAAACCAGACCCUGAA  | UUCAGGGUCUGGUUUAGCAUCACCA  |

|           |                   |                            |                           |
|-----------|-------------------|----------------------------|---------------------------|
| 154669B12 | Slit3/MSS209191   | GGCUCUGAGGAUUAUCGCAACAGAU  | AUCUGUUGCGAUAAUCCUCAGAGCC |
| 154669C02 | Sdc4/MSS238085    | UCGGAUGACUUUGAGCUCUCGGGUU  | AACCCGAGAGCUCAAAGUCAUCCGA |
| 154669C04 | Sdc4/MSS238086    | GAGAGUCGAUUCGAGAGACAGAGGU  | ACCUCUGUCUCUCGAAUCGACUCUC |
| 154669C06 | Sdc4/MSS238087    | GGAACUGGAAGAGAAUGAGGUCAUU  | AAUGACCUCAUUCUCUUCAGUUC   |
| 154669C08 | Abl1/MSS235748    | ACCACUUGGUGAAGGUGGCUGAUUU  | AAAUCAGCCACCUUCACCAAGUGGU |
| 154669C10 | Abl1/MSS235749    | UGACCUAUGGGAACCUUGCUGGACUA | UAGUCCAGCAGGUUCCCAUAGGUCA |
| 154669C12 | Abl1/MSS235750    | GGAUUGGUGUGAAGCCCAAACGAAA  | UUUCGUUUGGGCUUCACACCAUUC  |
| 154669D02 | Cables1/MSS226994 | UCCGACUGAACAGACGAGAACUGAU  | AUCAGUUCUCGUCUGUUCAGUCGGA |
| 154669D04 | Cables1/MSS226995 | GGAGACUUUGUGGACUACGACCCAA  | UUGGGUCGUAGUCCACAAAGUCUCC |
| 154669D06 | Cables1/MSS226996 | GGCAUGAGCCUGAAGGAGAUCAUU   | AAUGAUCUCCUUCAGGCUCAUGGCC |
| 154669D08 | Cables2/MSS217424 | UCCCUCAUAUCAAAACUGACAUUGAG | CUCAAUGUCAGUUUGAUUAGAGGGA |
| 154669D10 | Cables2/MSS217426 | GCGUGUACUCAUCUUUGCUUCAUAC  | GUAUGAAGCAAAGAUGAGUACACGC |
| 154669D12 | Cables2/MSS281084 | CAAAGAACAGCAGGAUUGUACUCAU  | AUGAGUACAAUCCUGCUGUUCUUUG |
